# Supplementary figures and images for: The effect of thermal expansion on photoisomerisation in the crystals of [Co(NH3)5NO2]Cl(NO3): different strain origins – different outcomes
Source: Royal Society of Chemistry journal article supplement (doi:10.1039/c6ce00840b), 2016-01-01

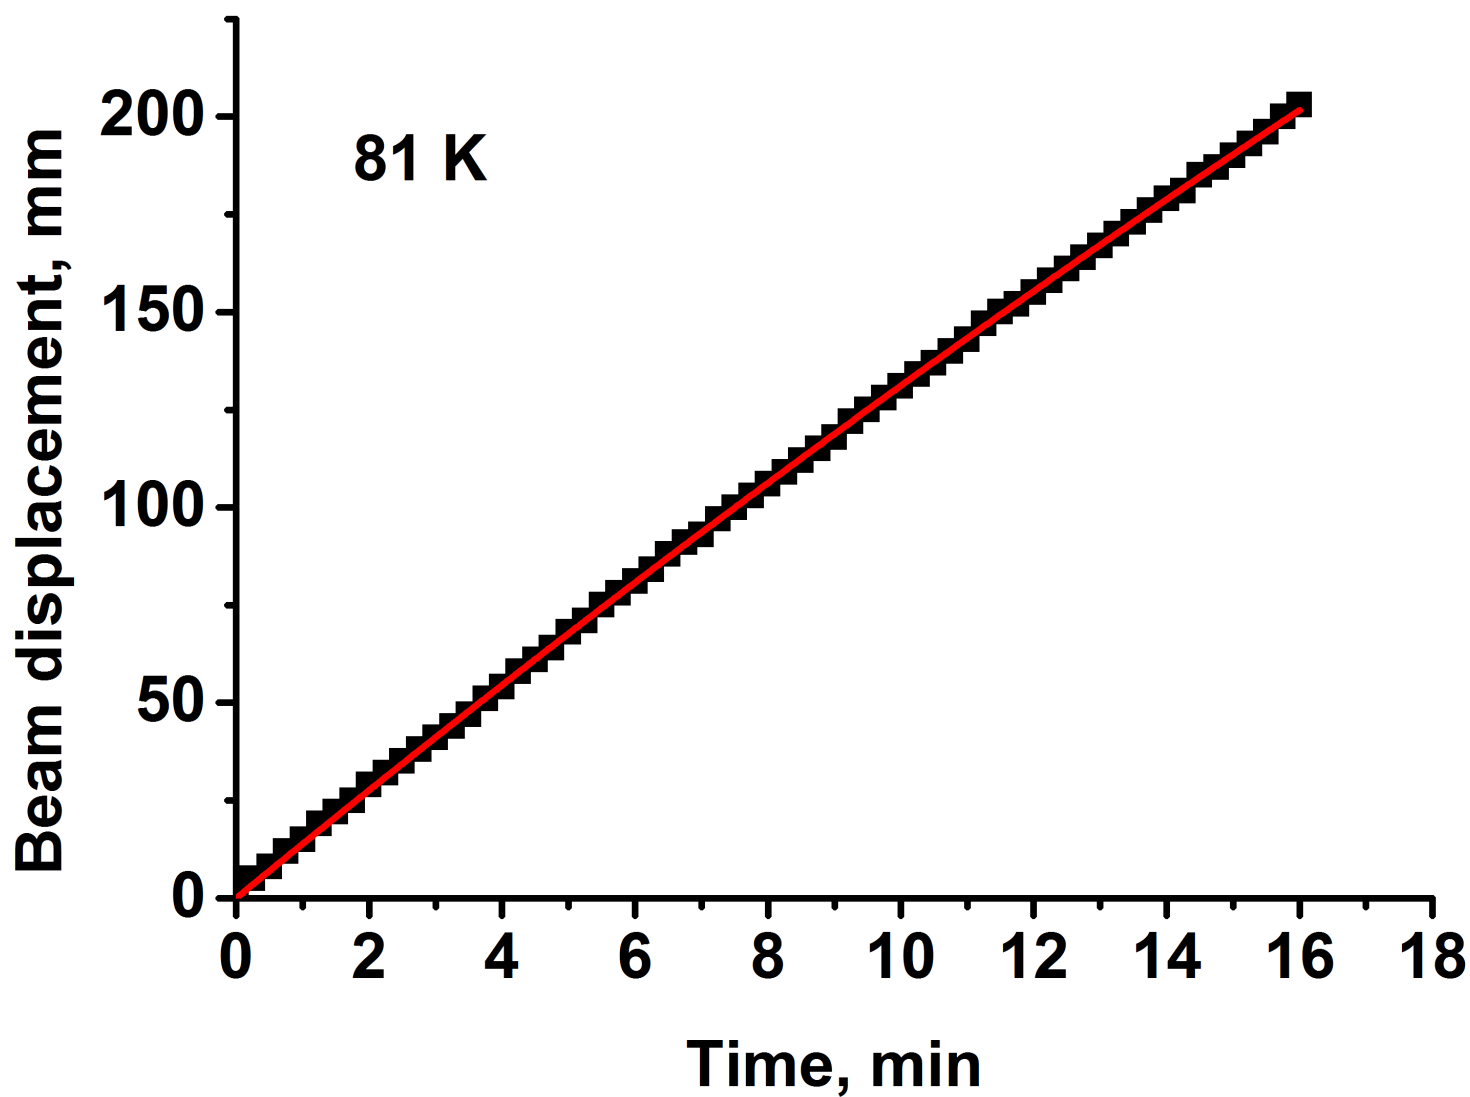

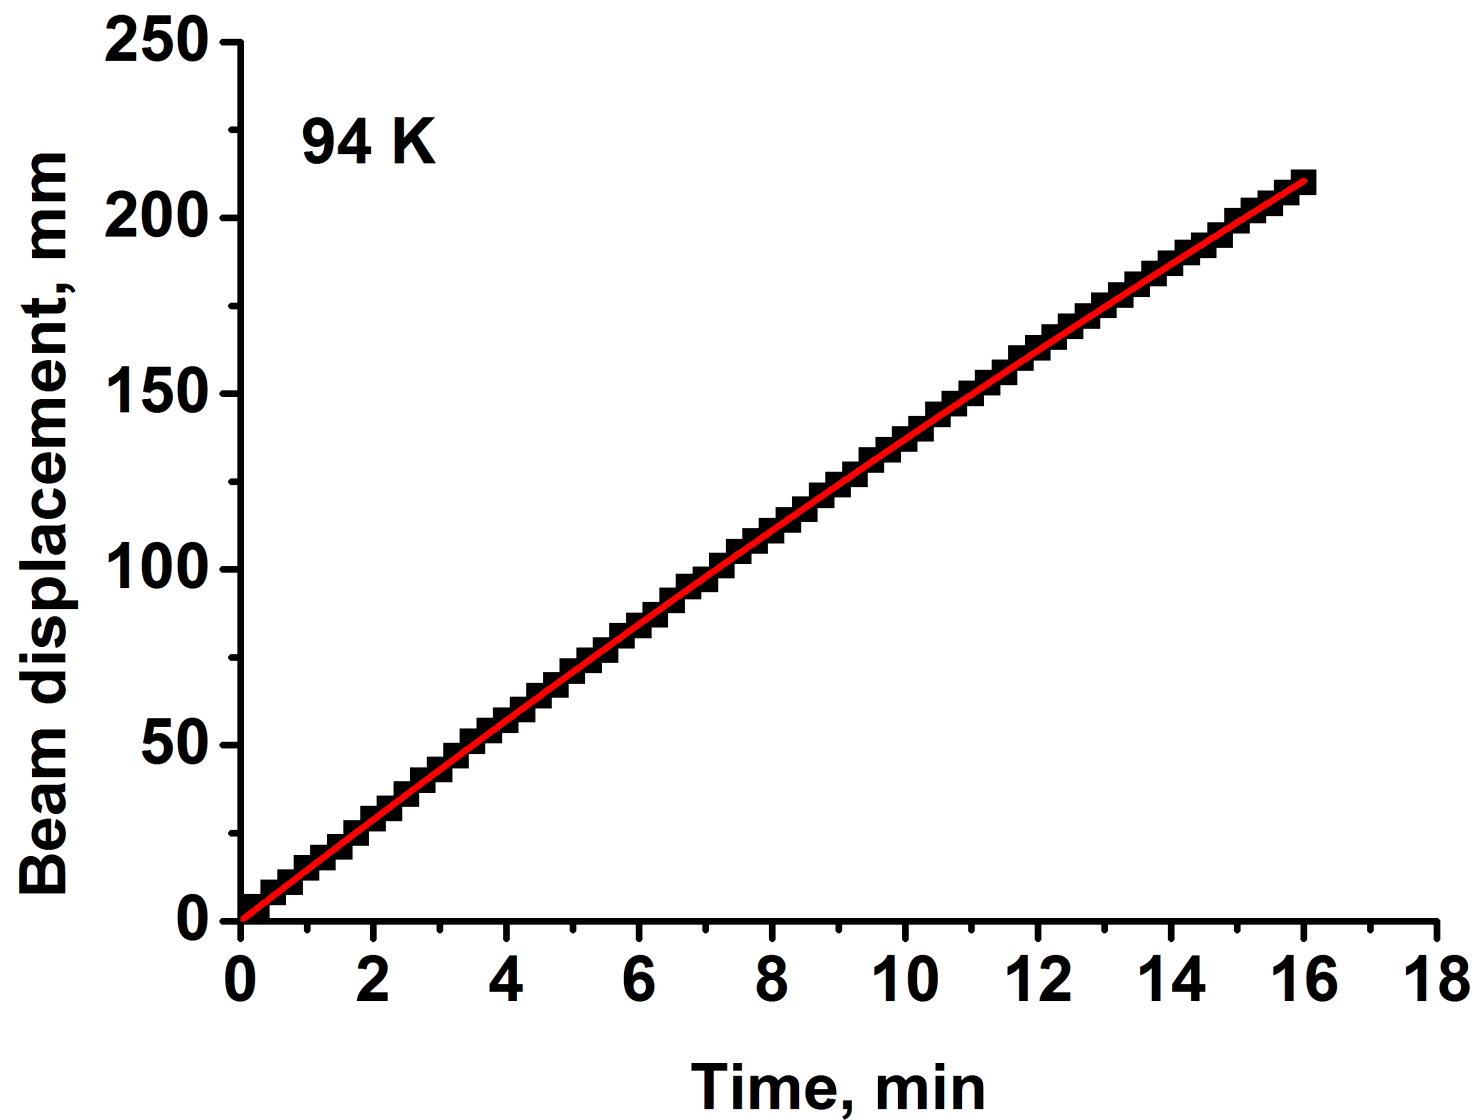

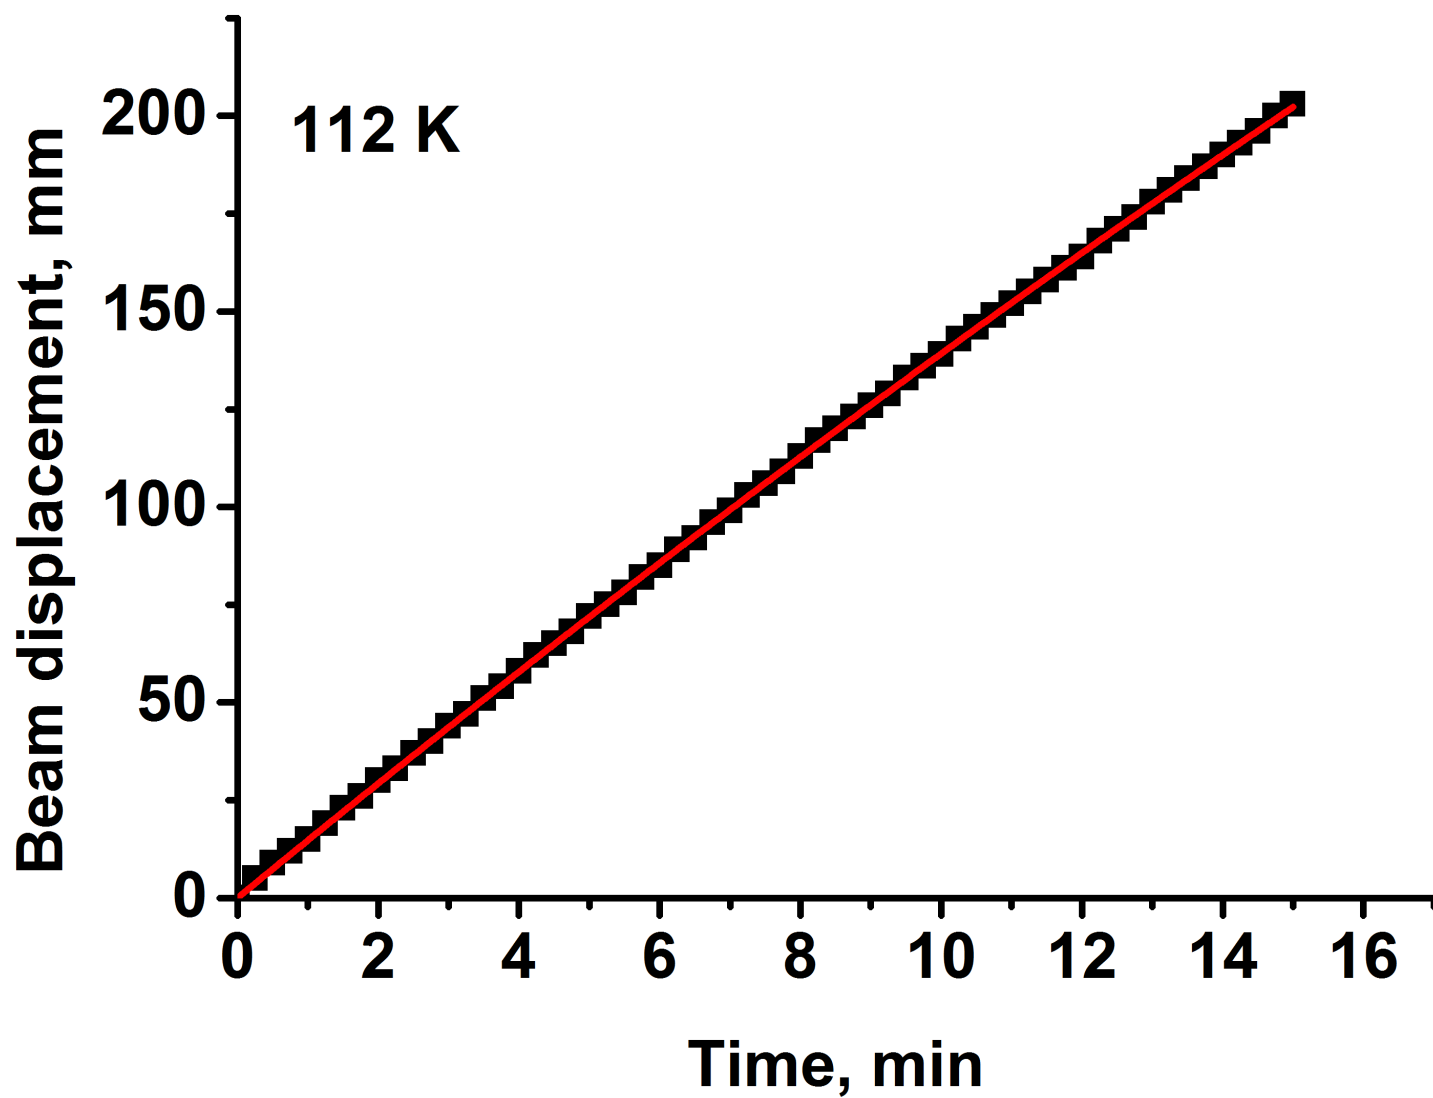

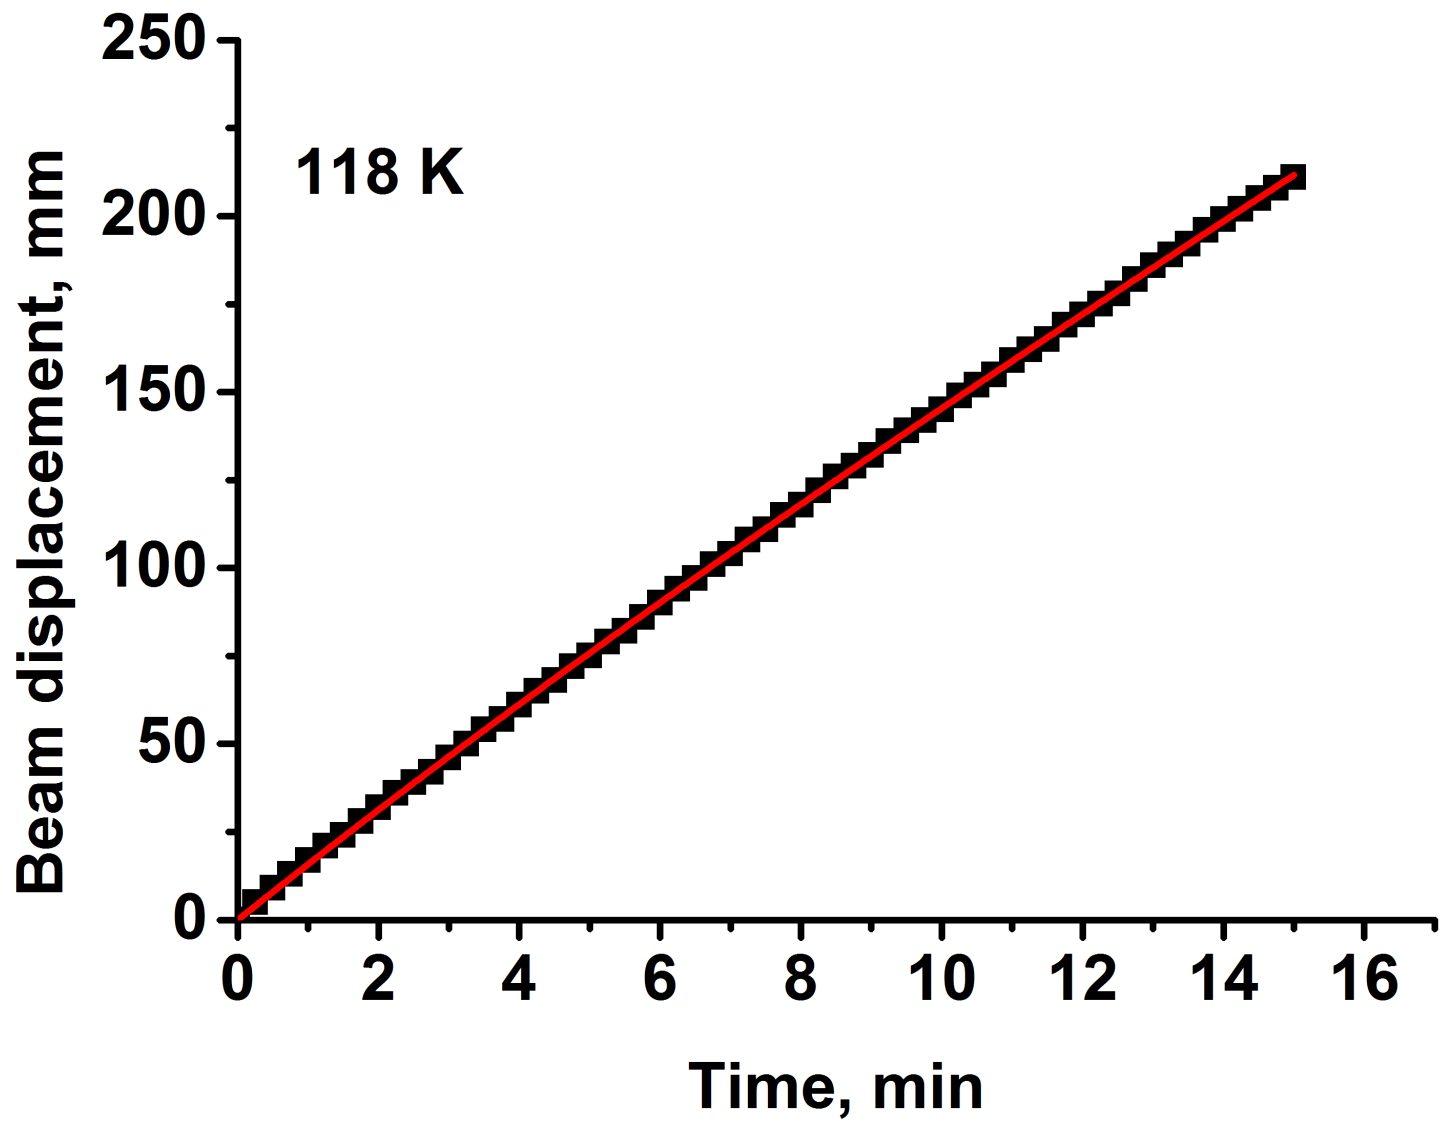

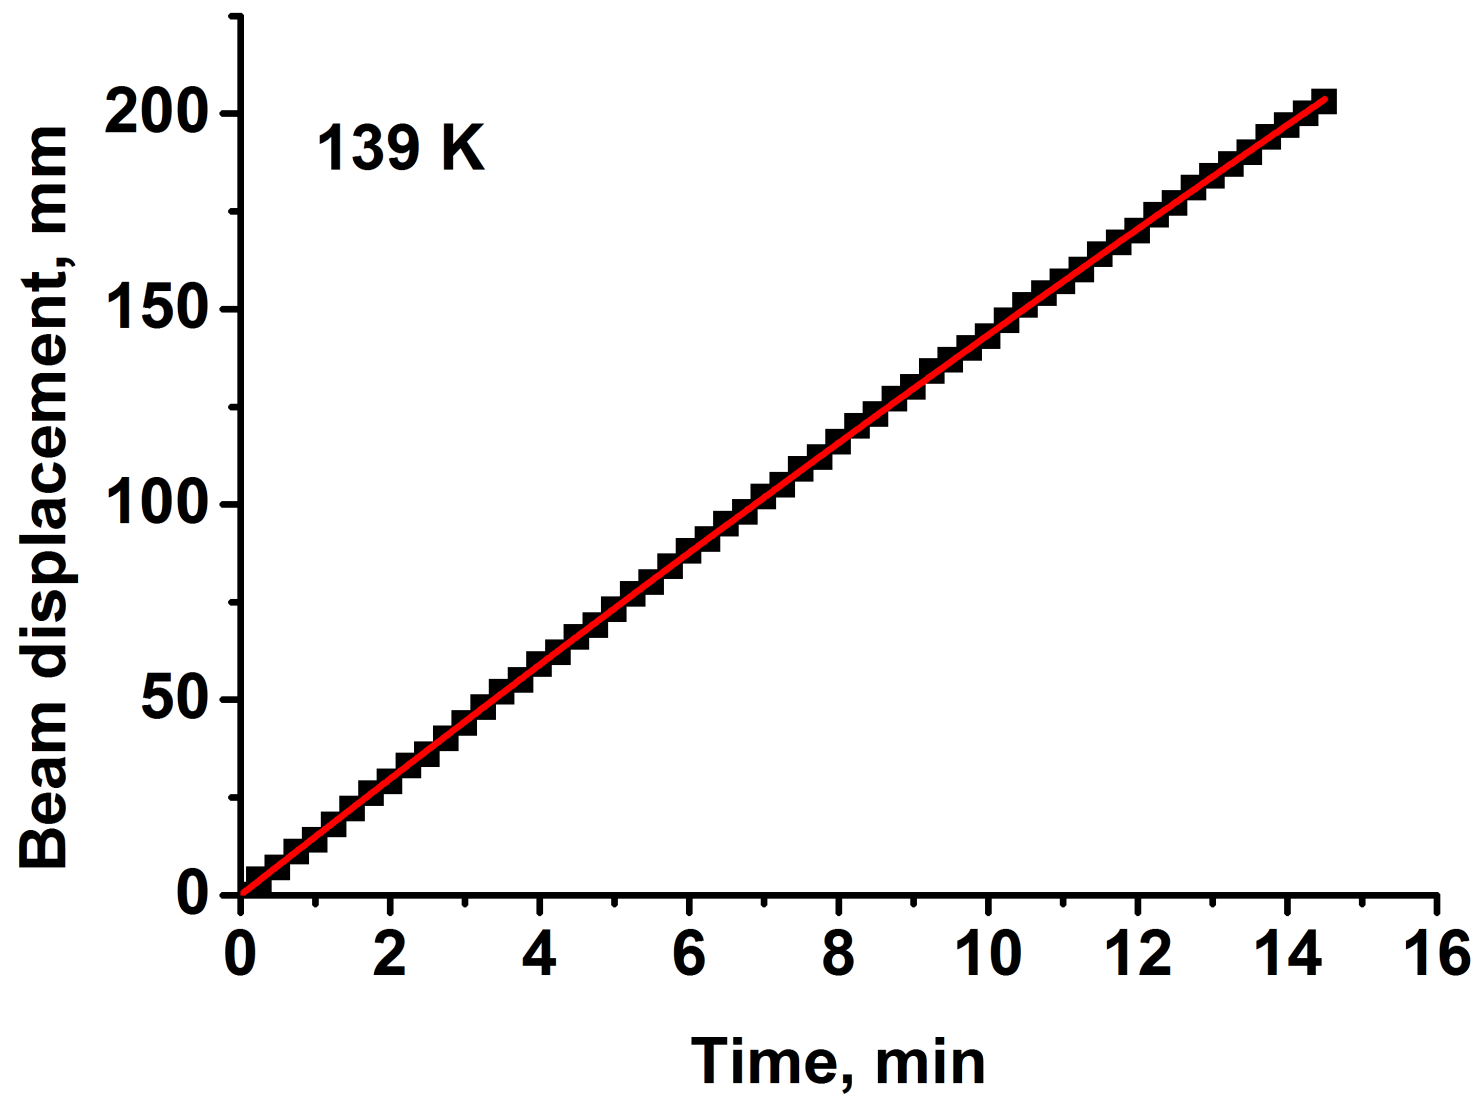

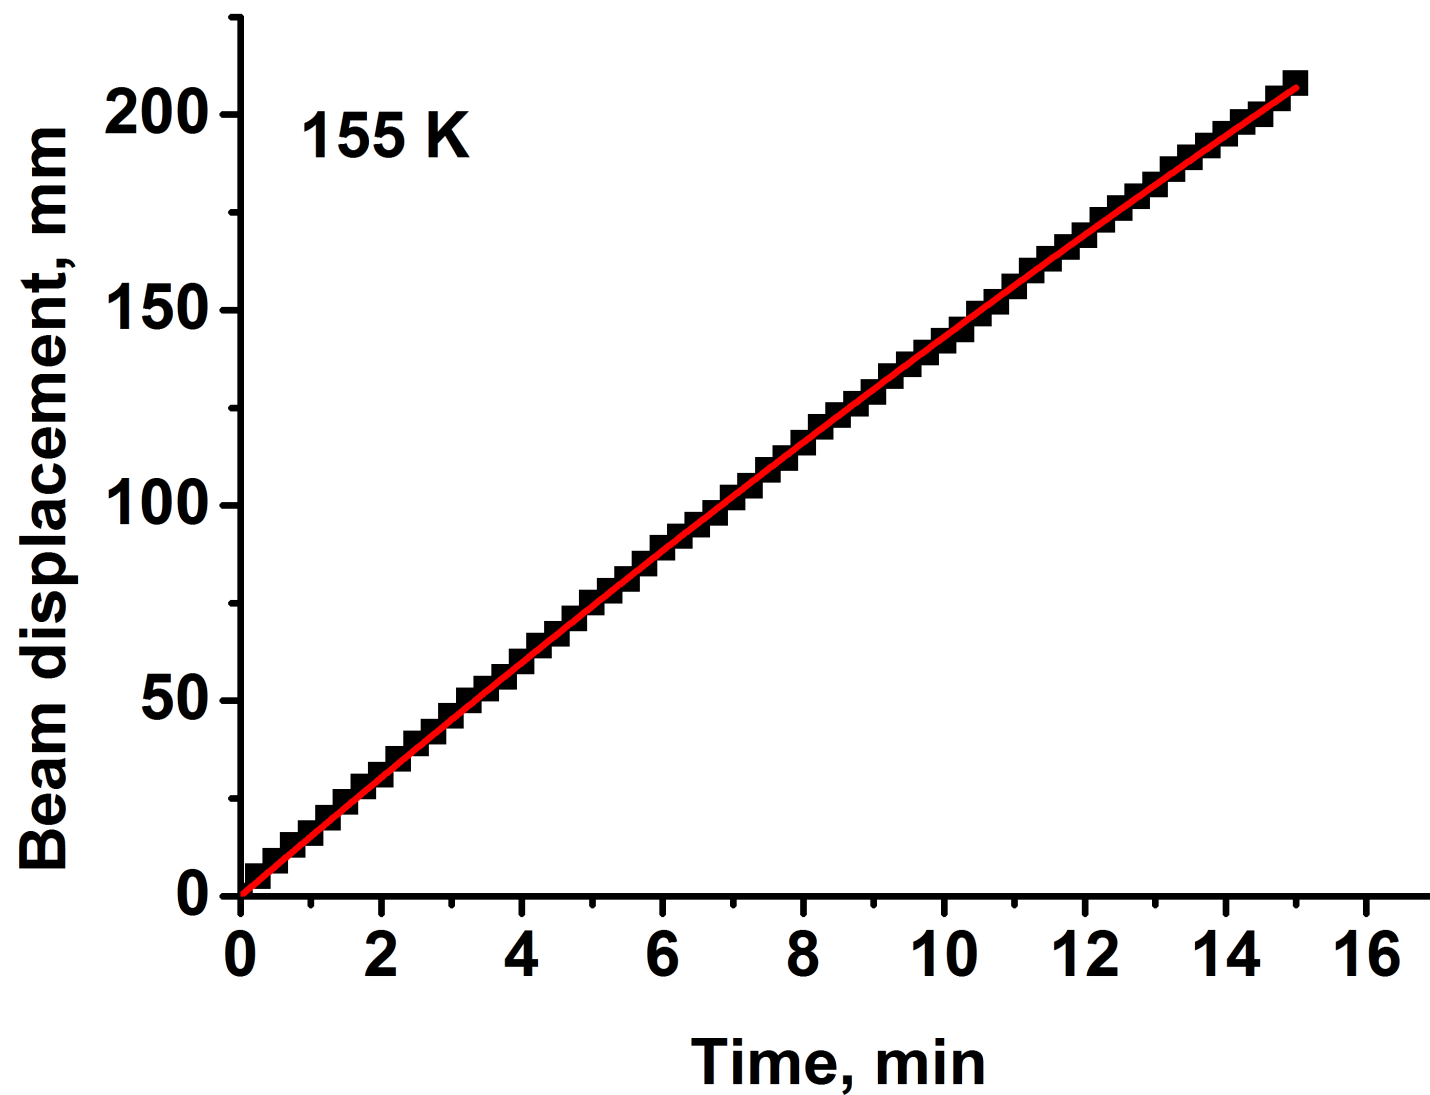

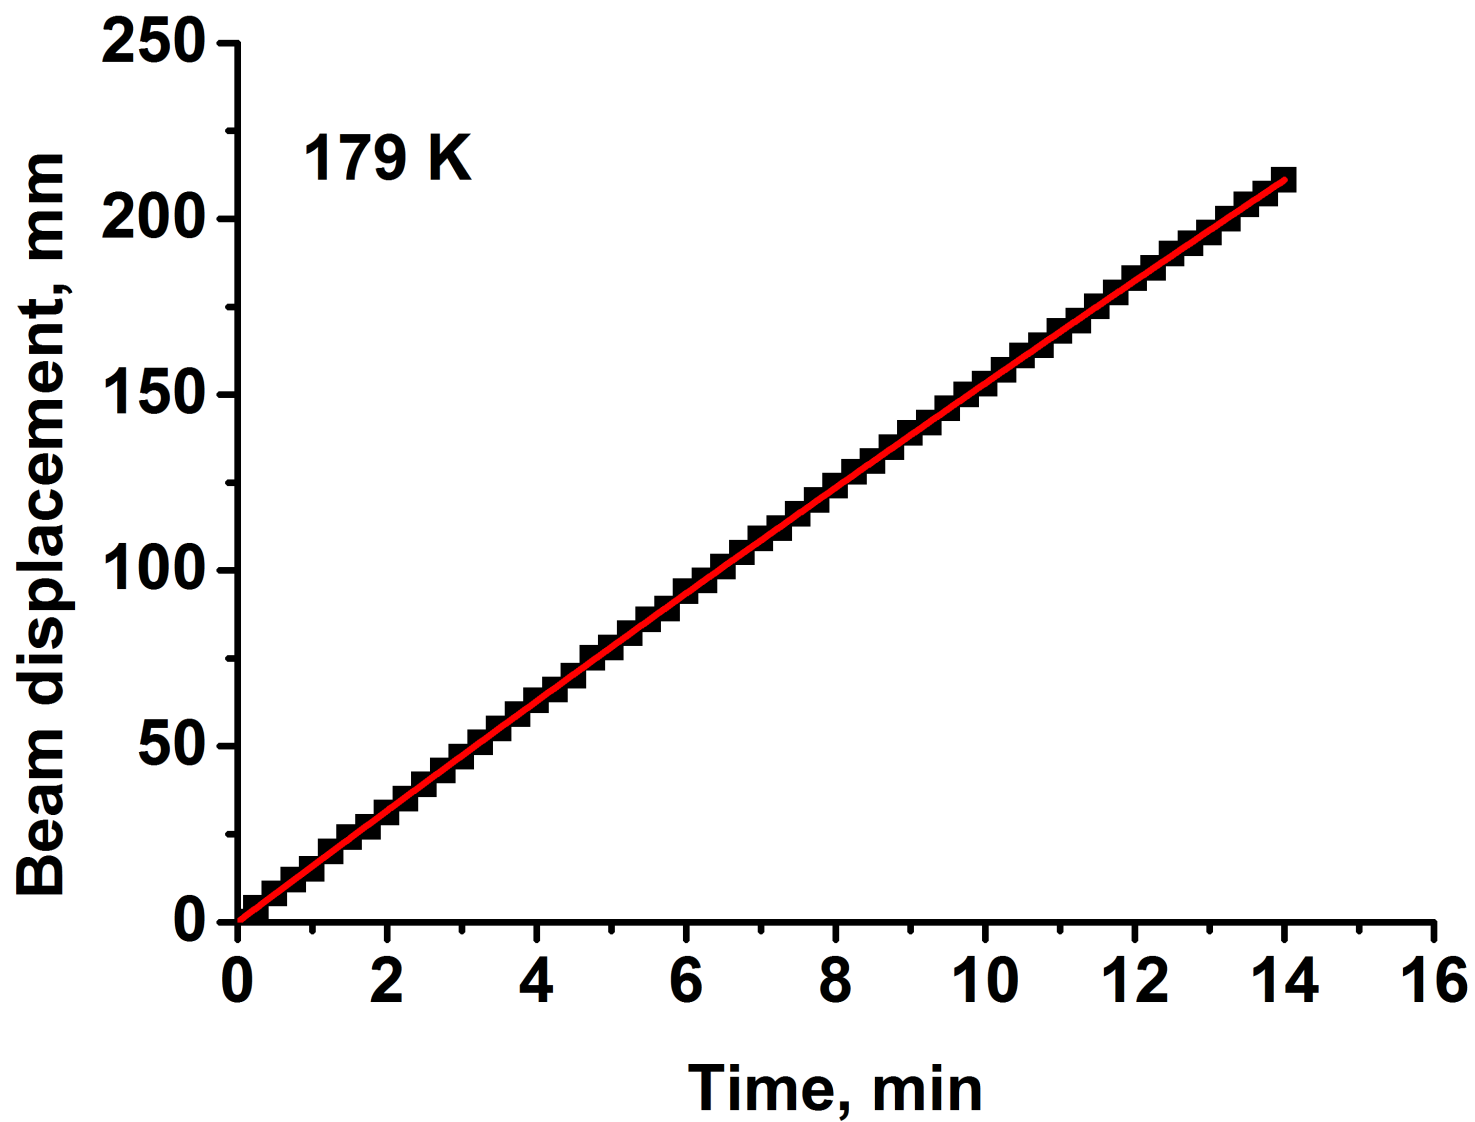

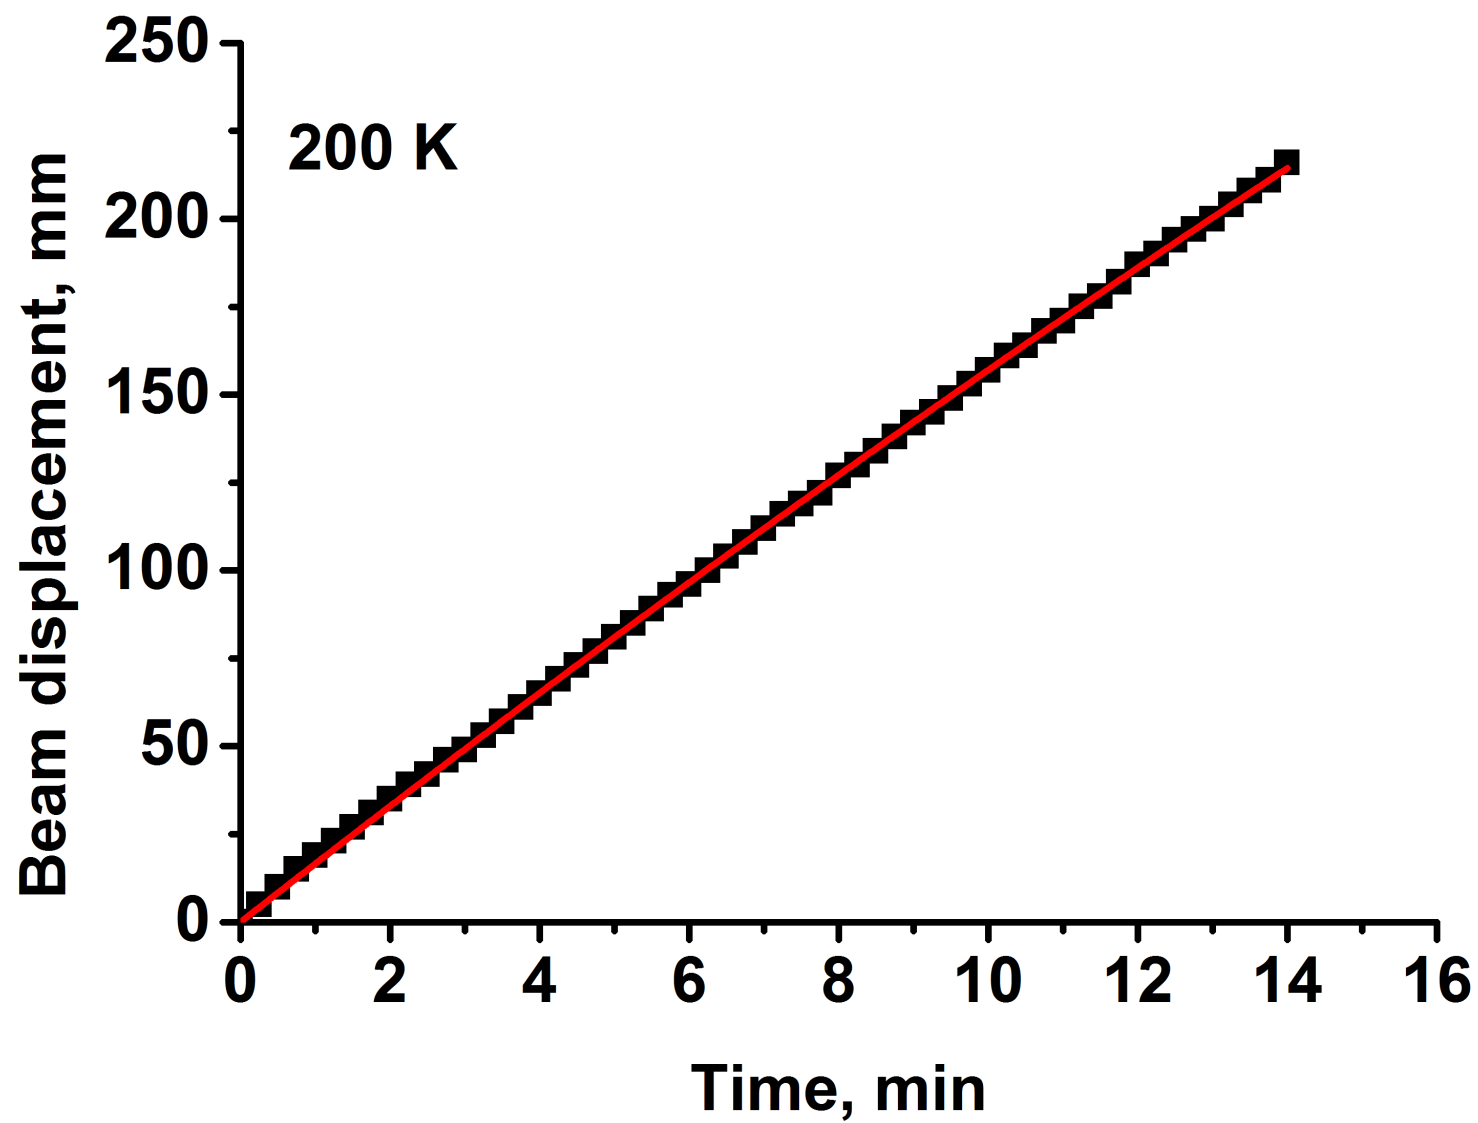



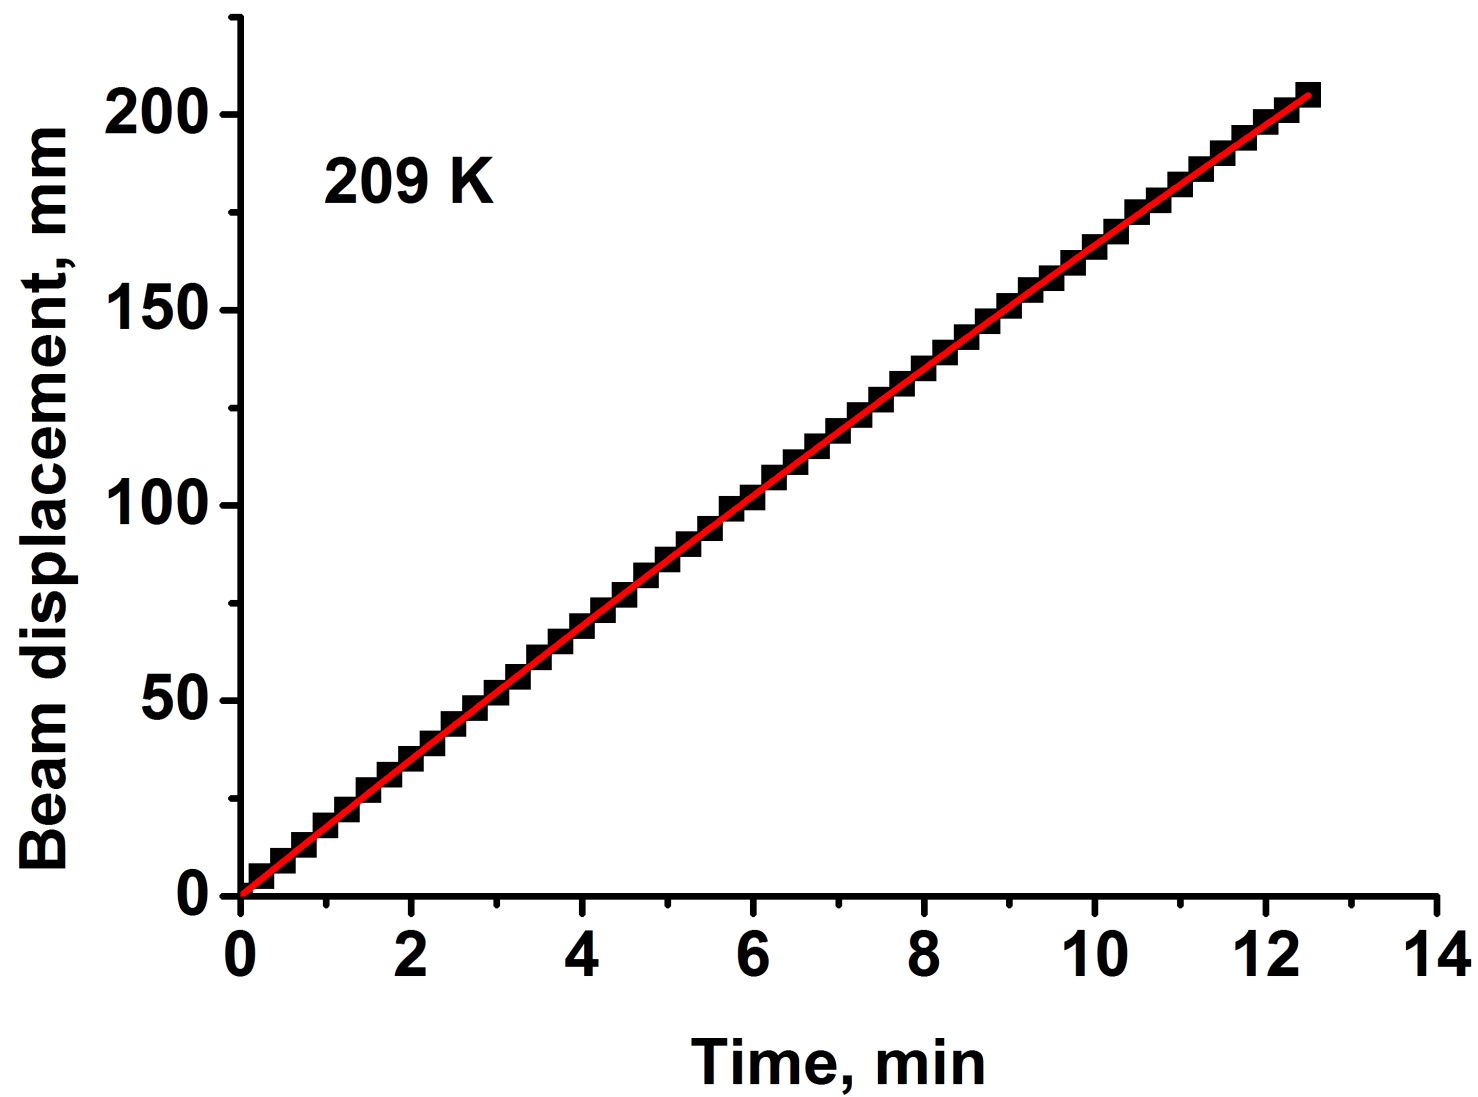

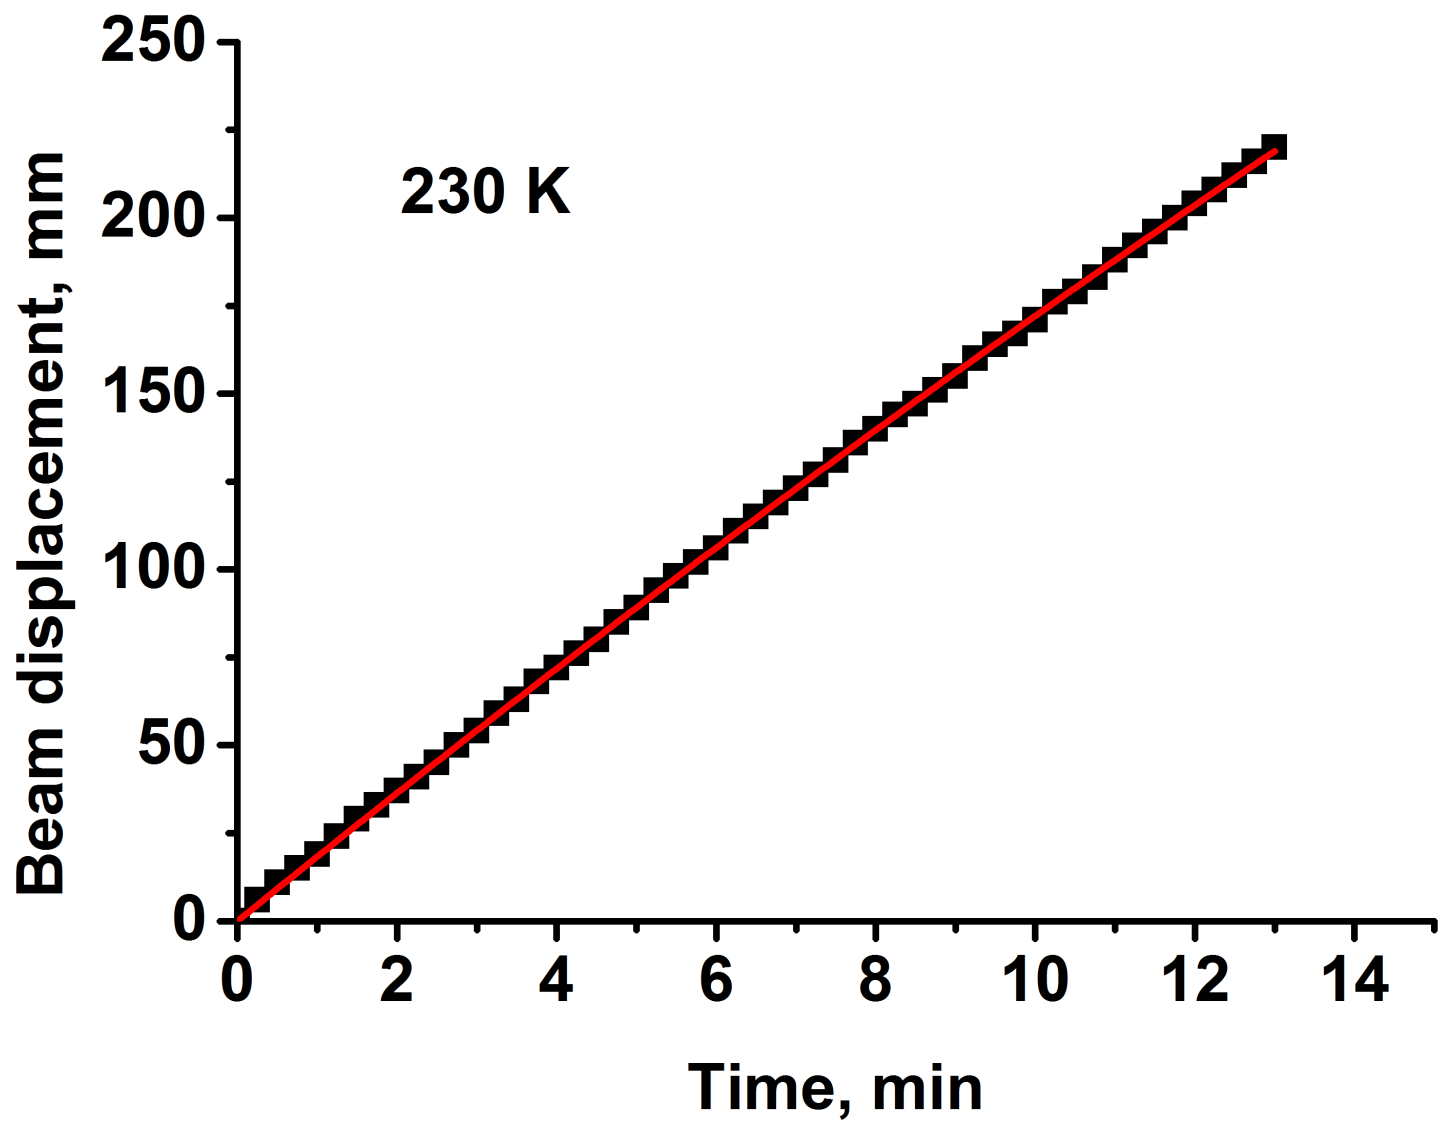

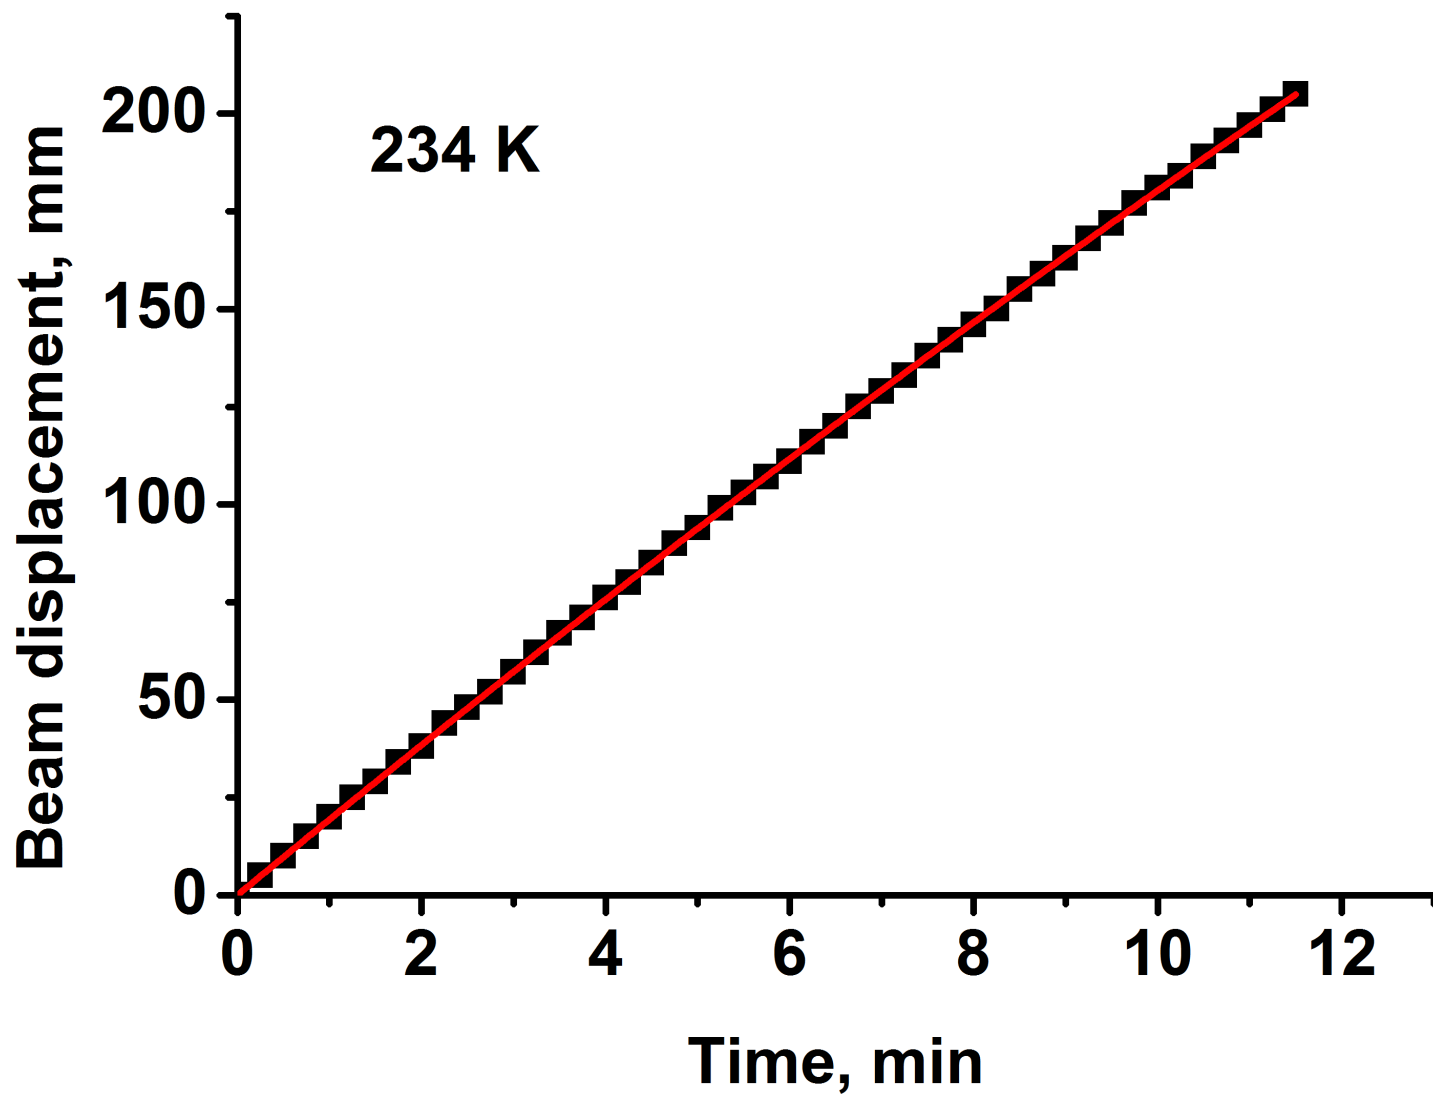

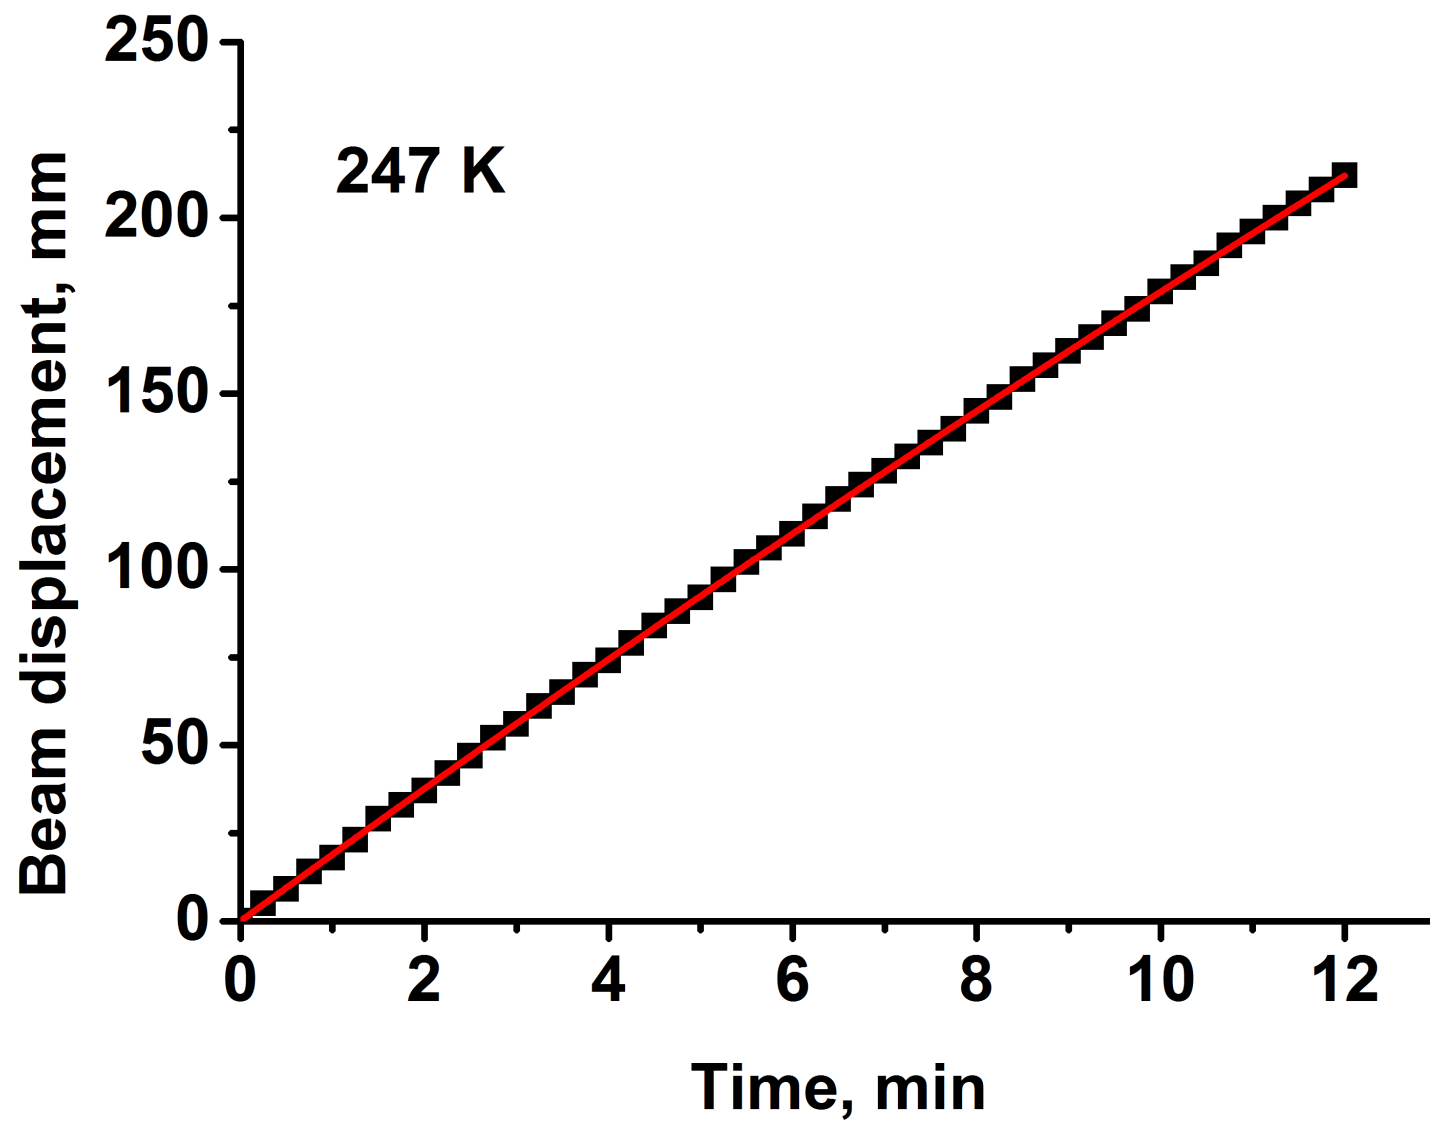

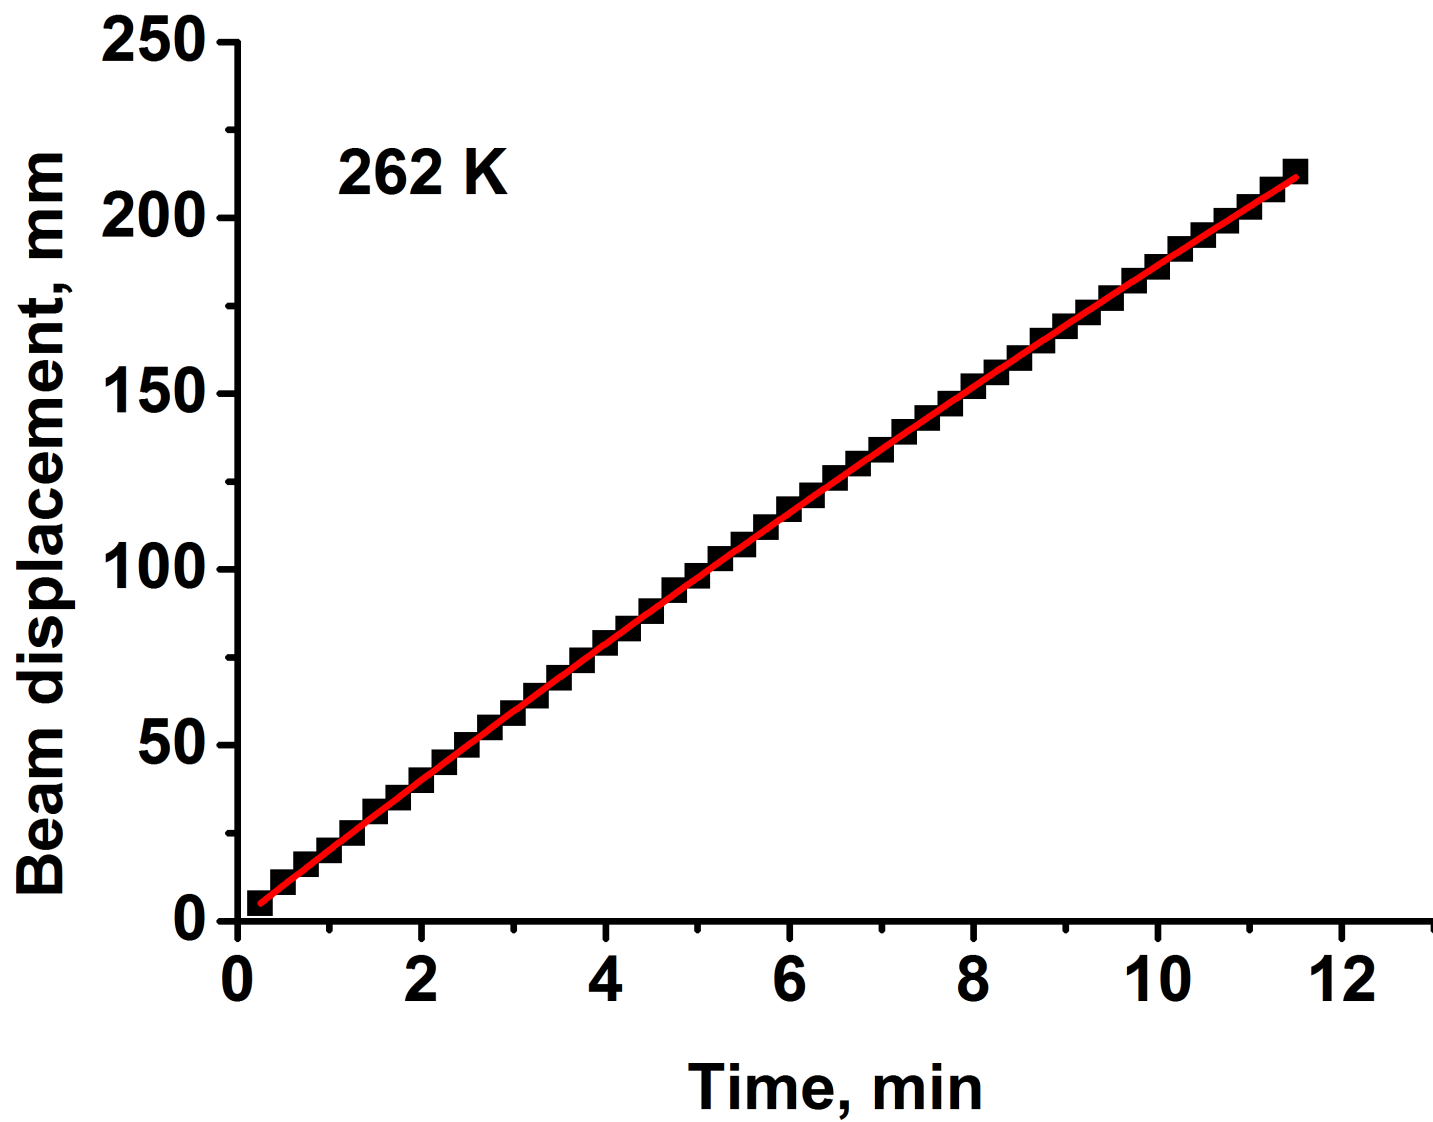

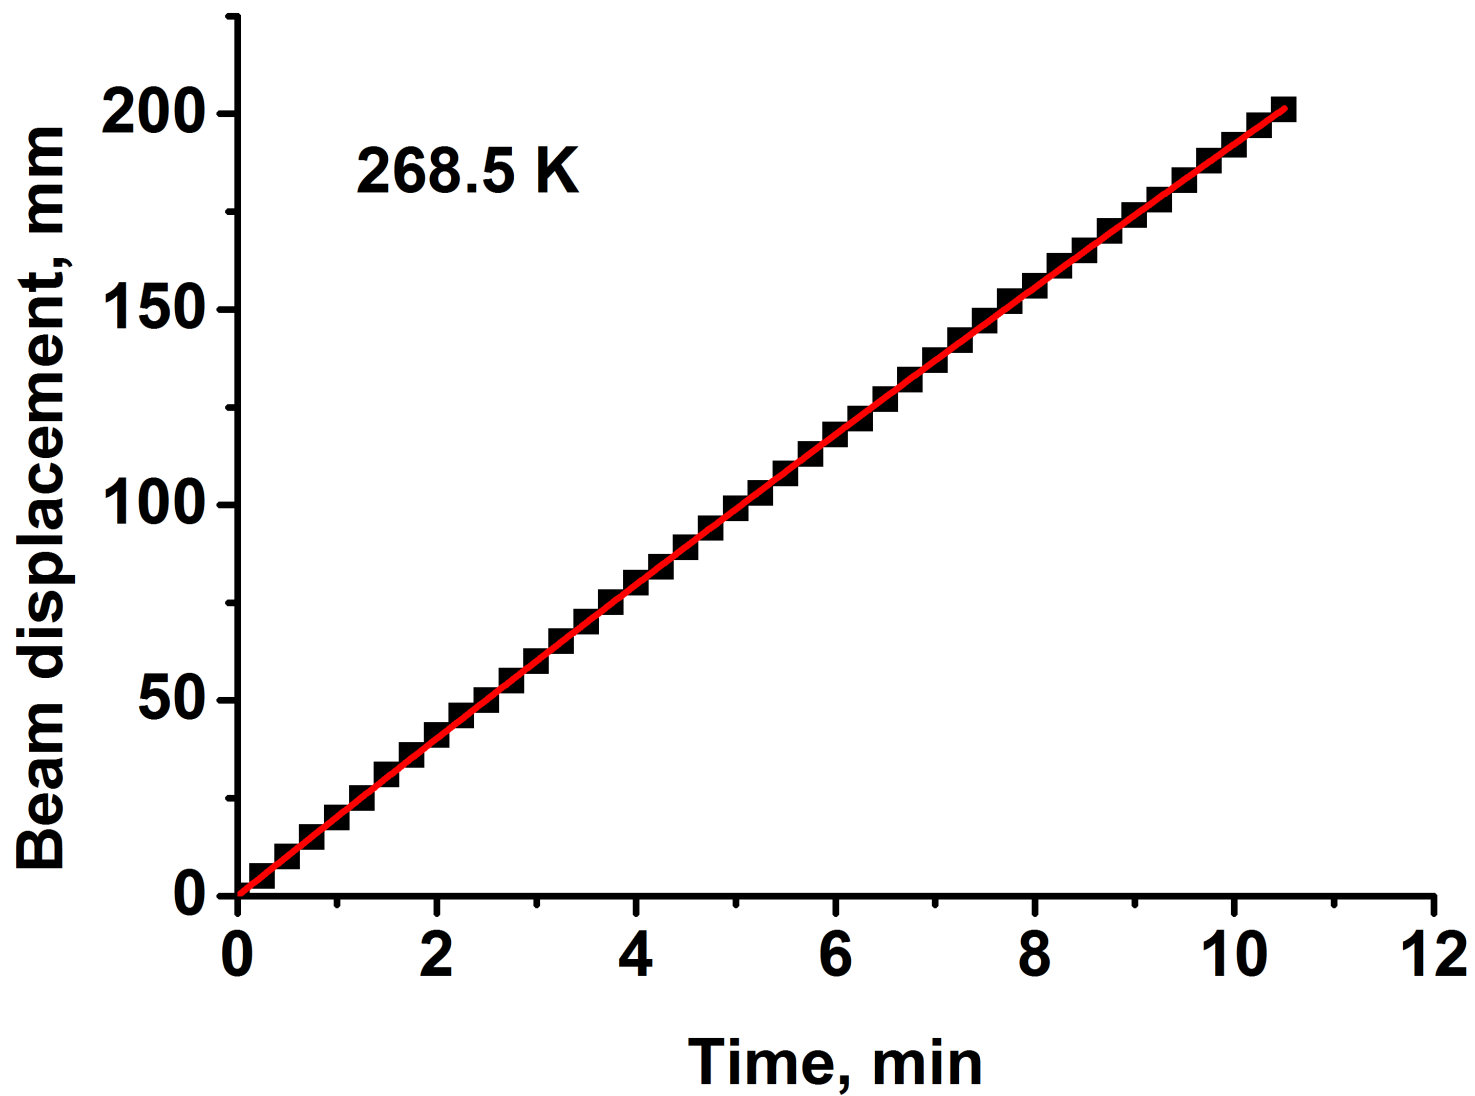

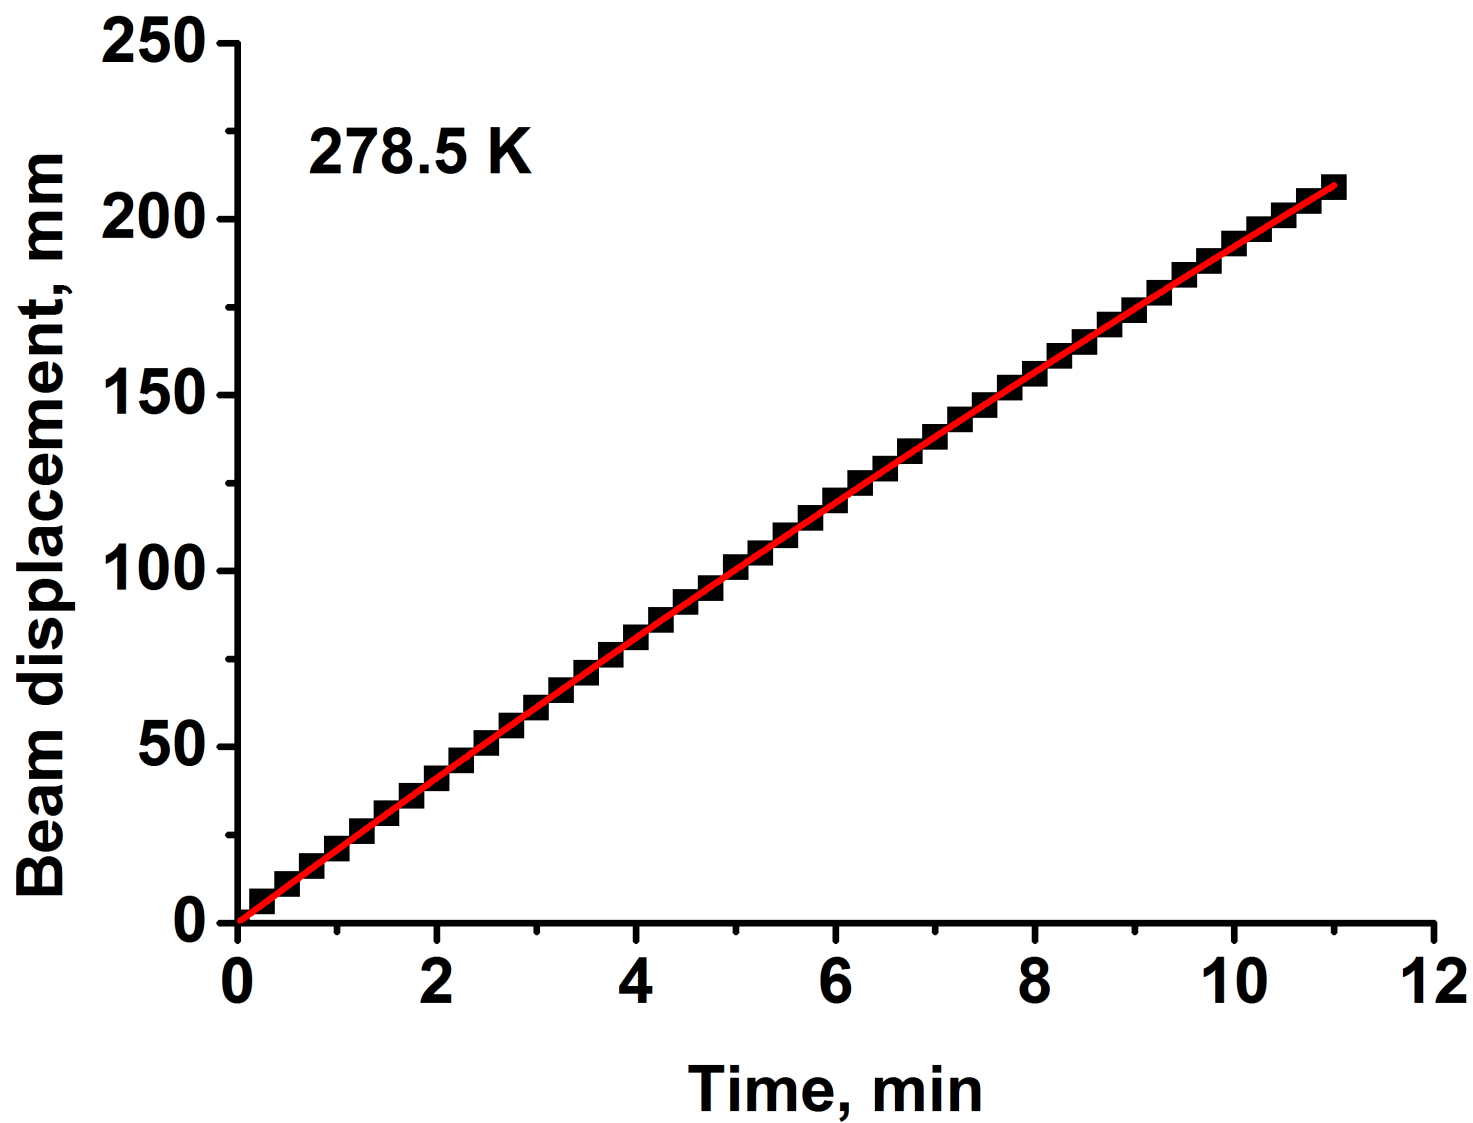

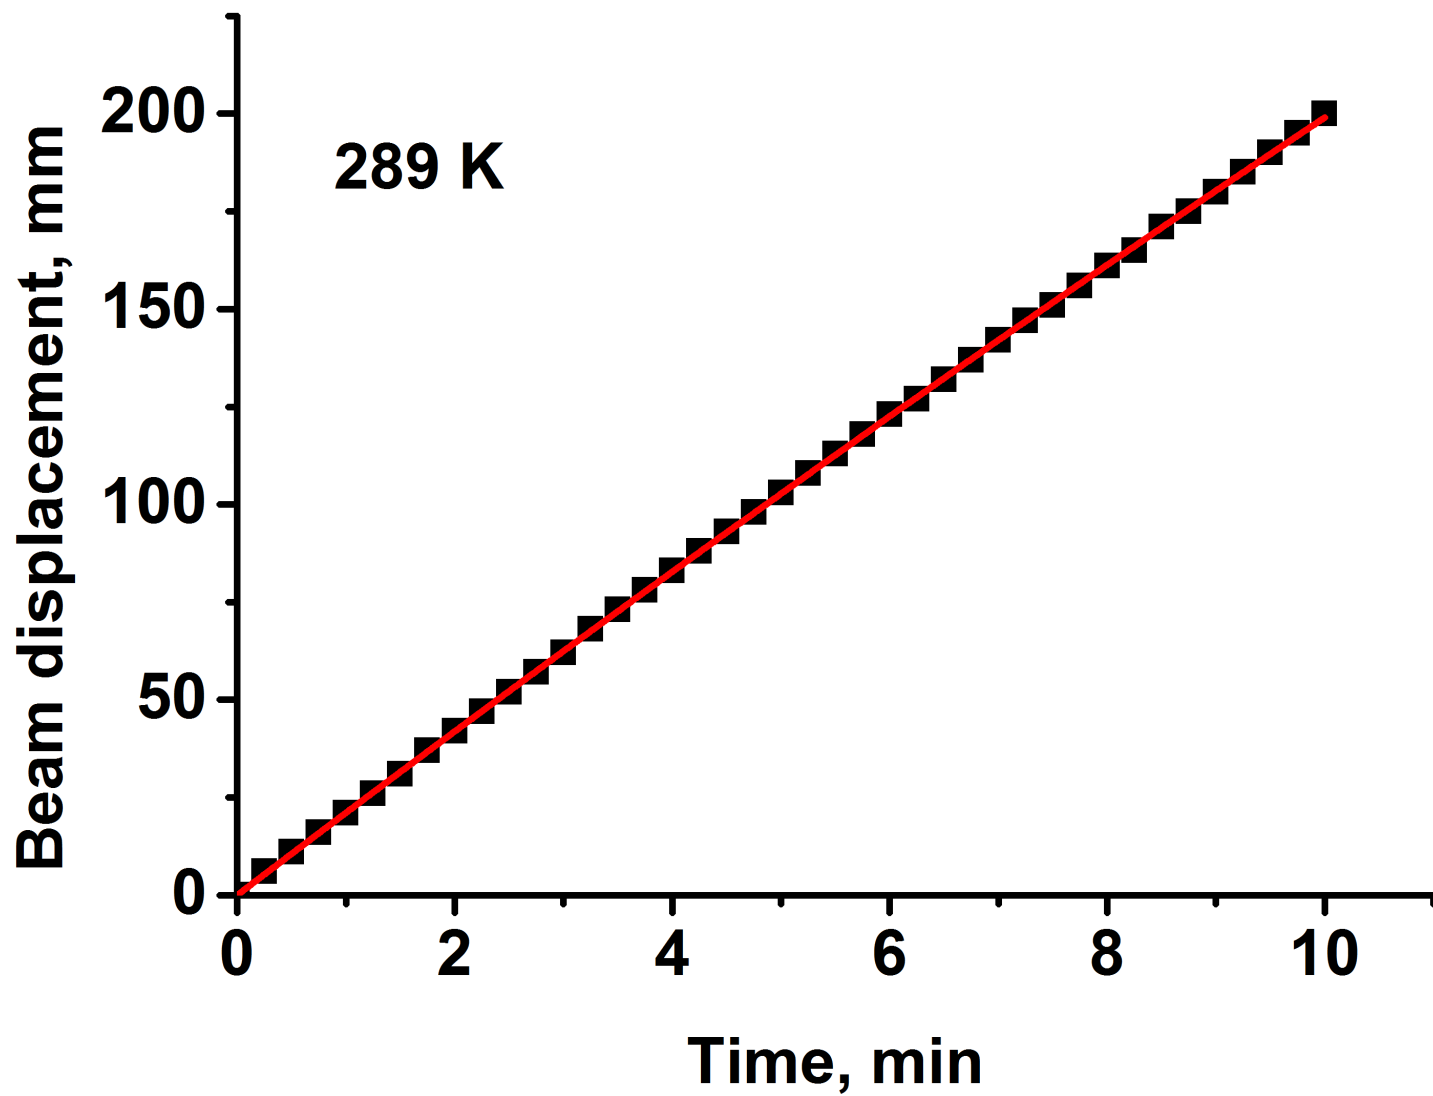



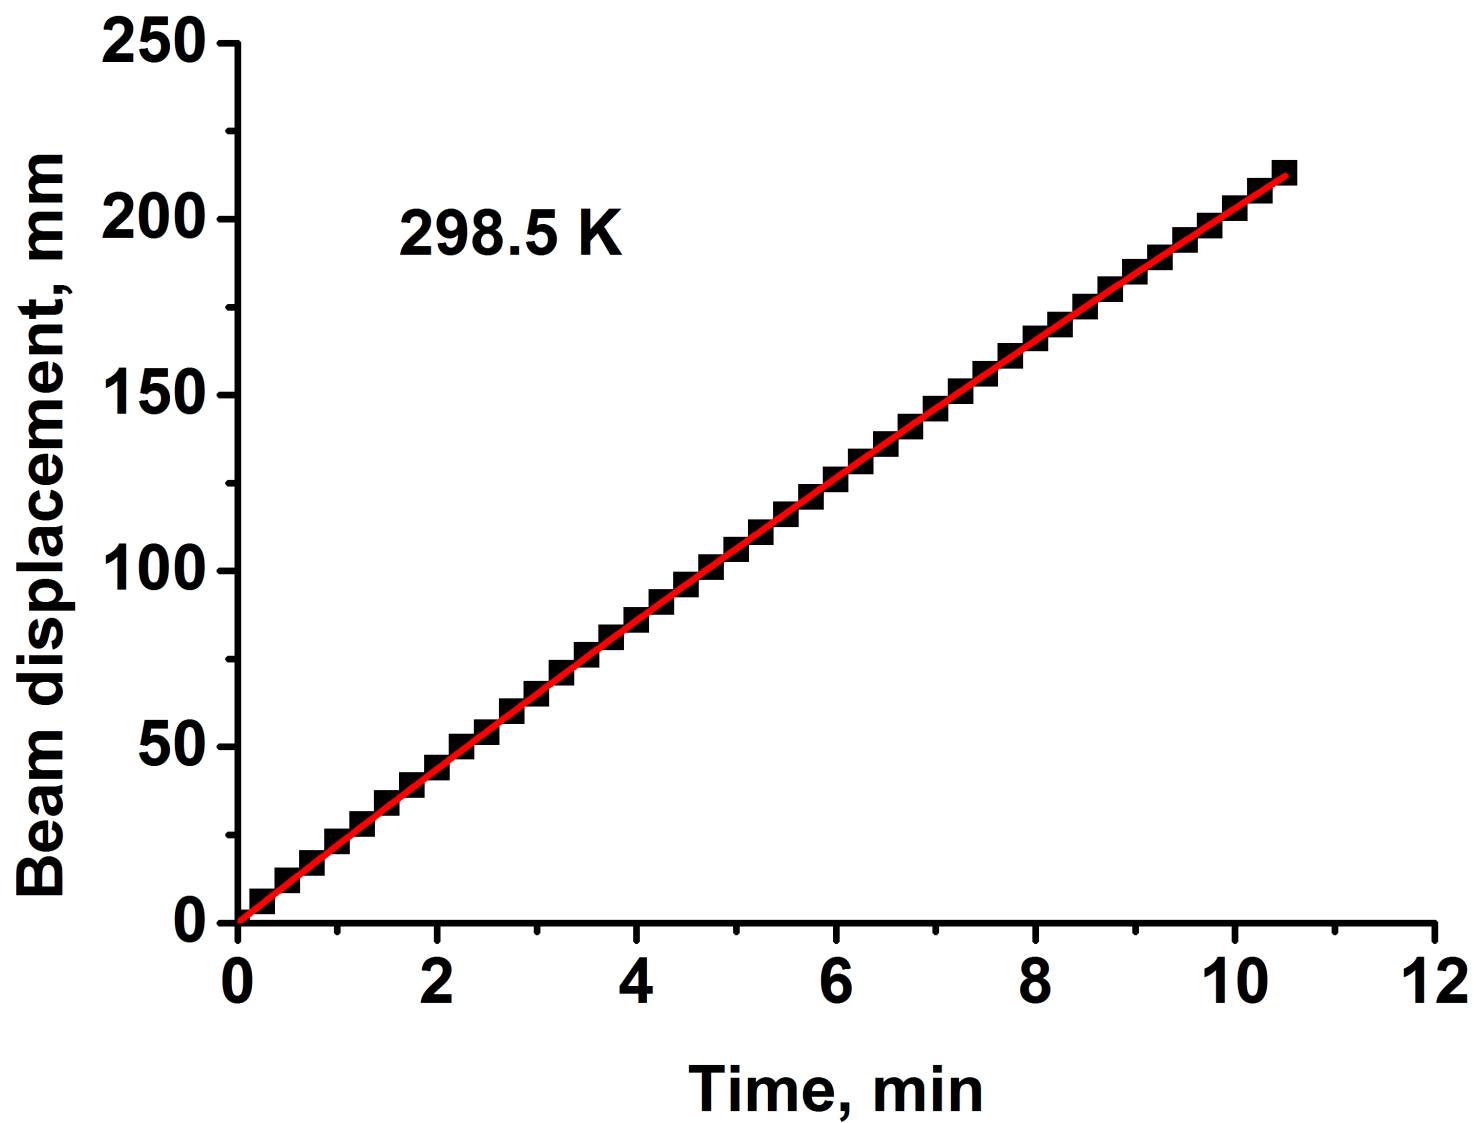

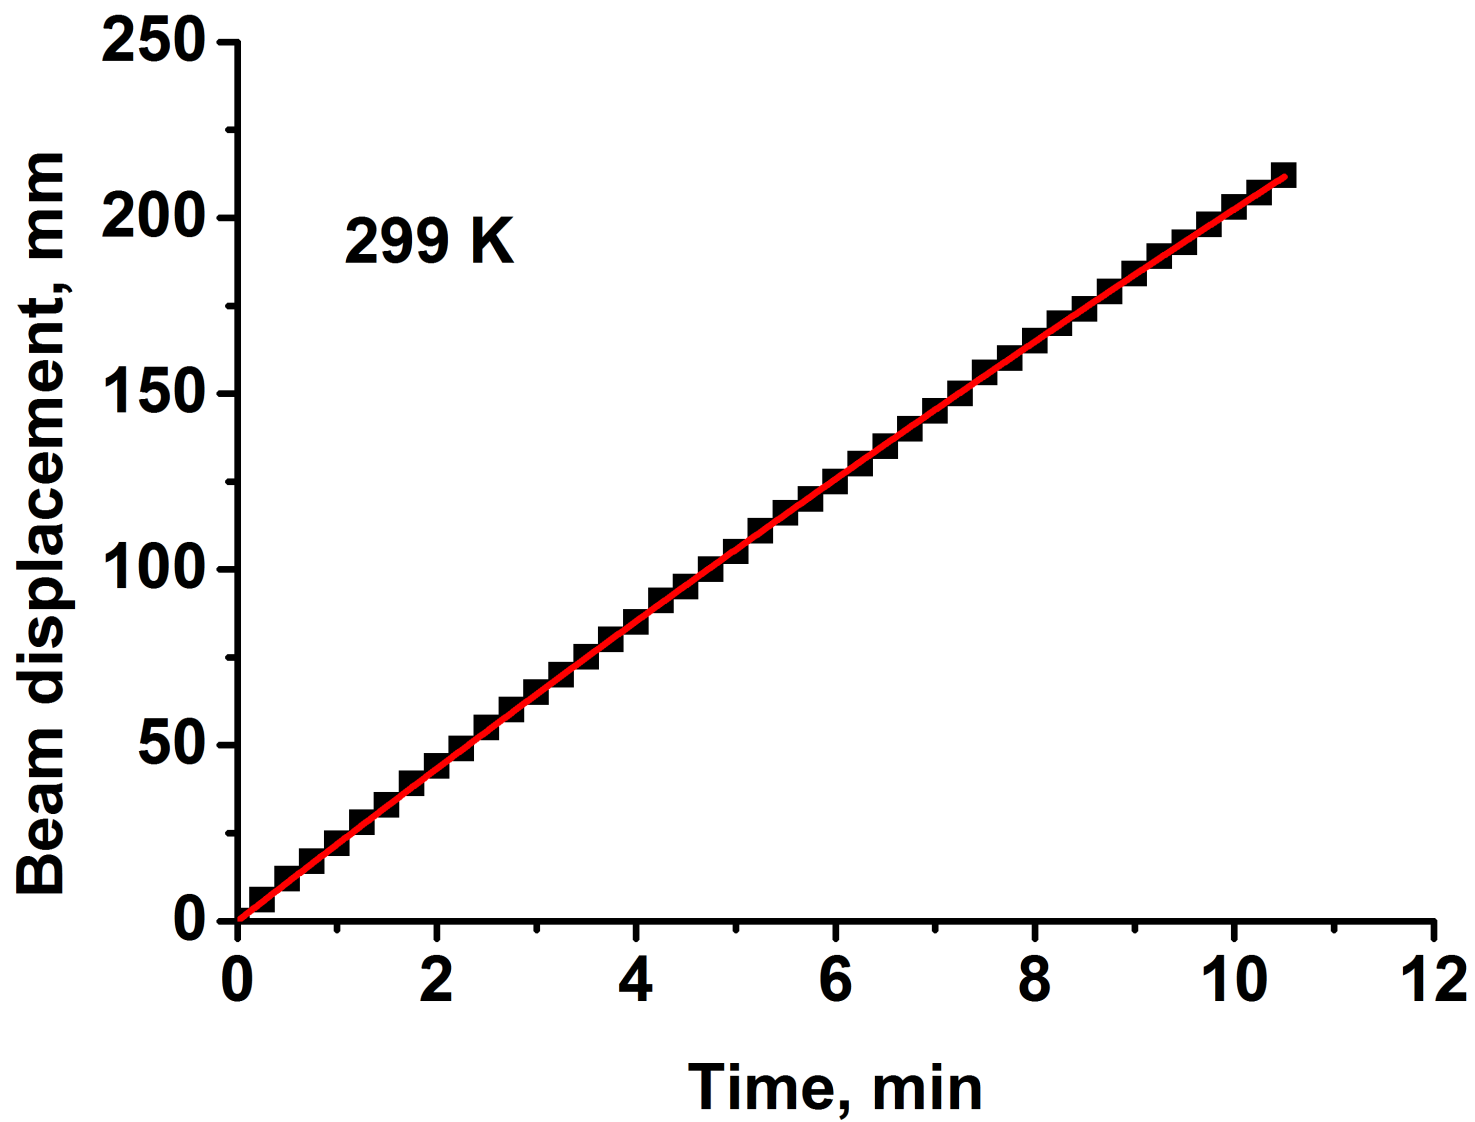

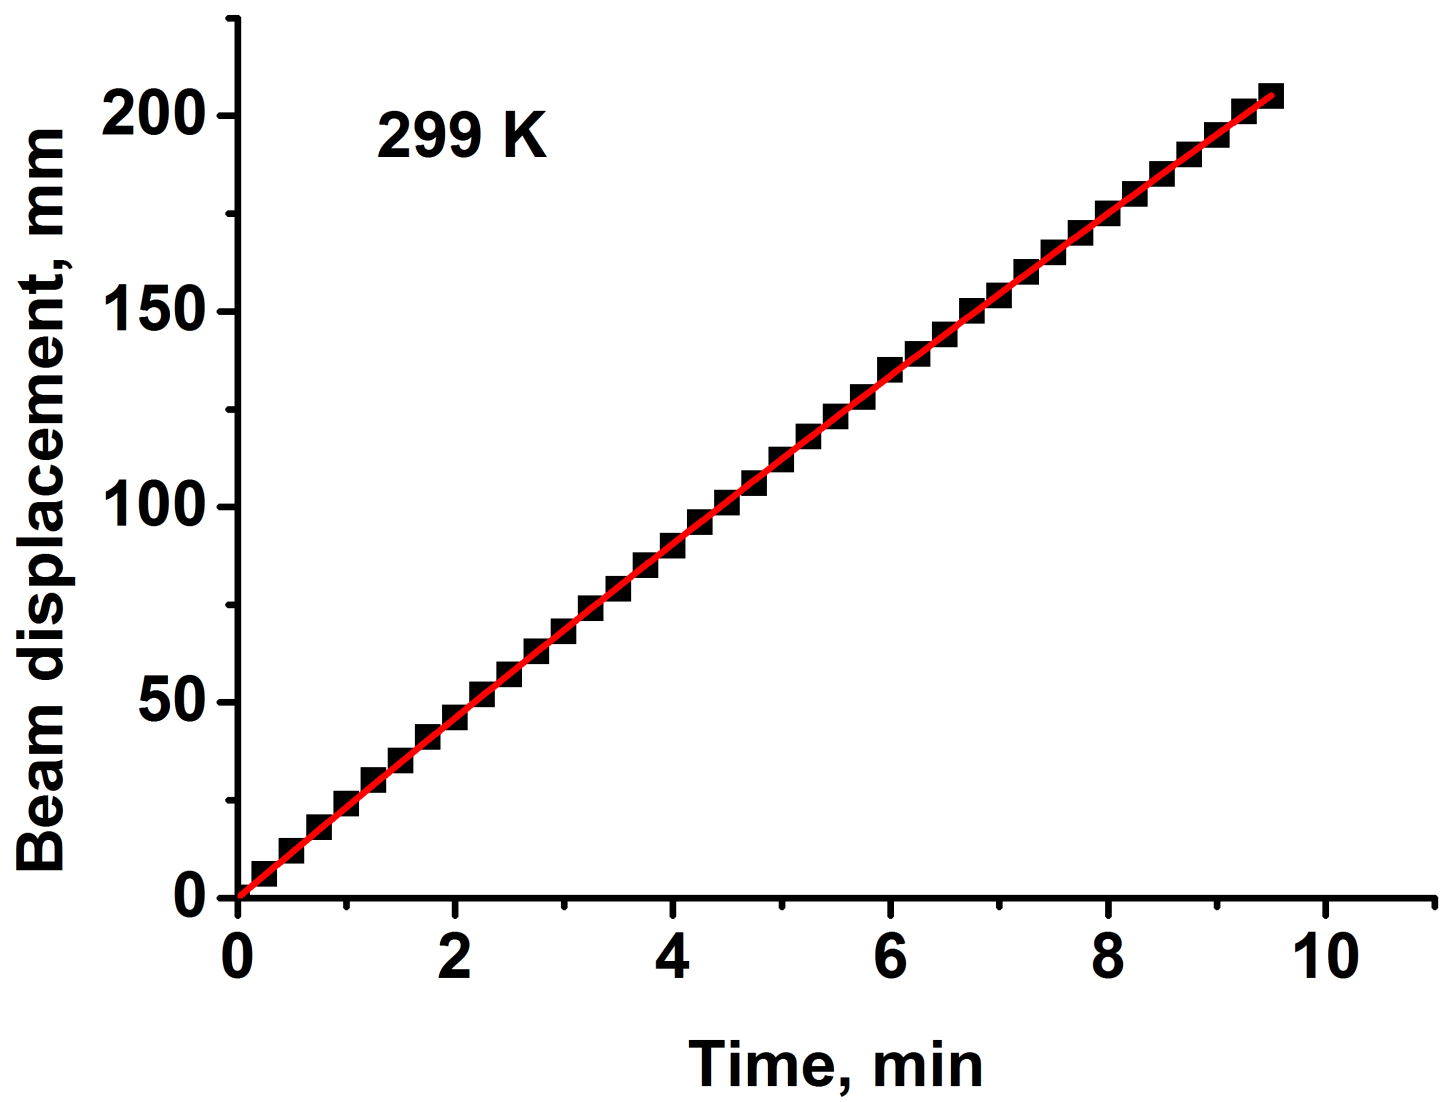

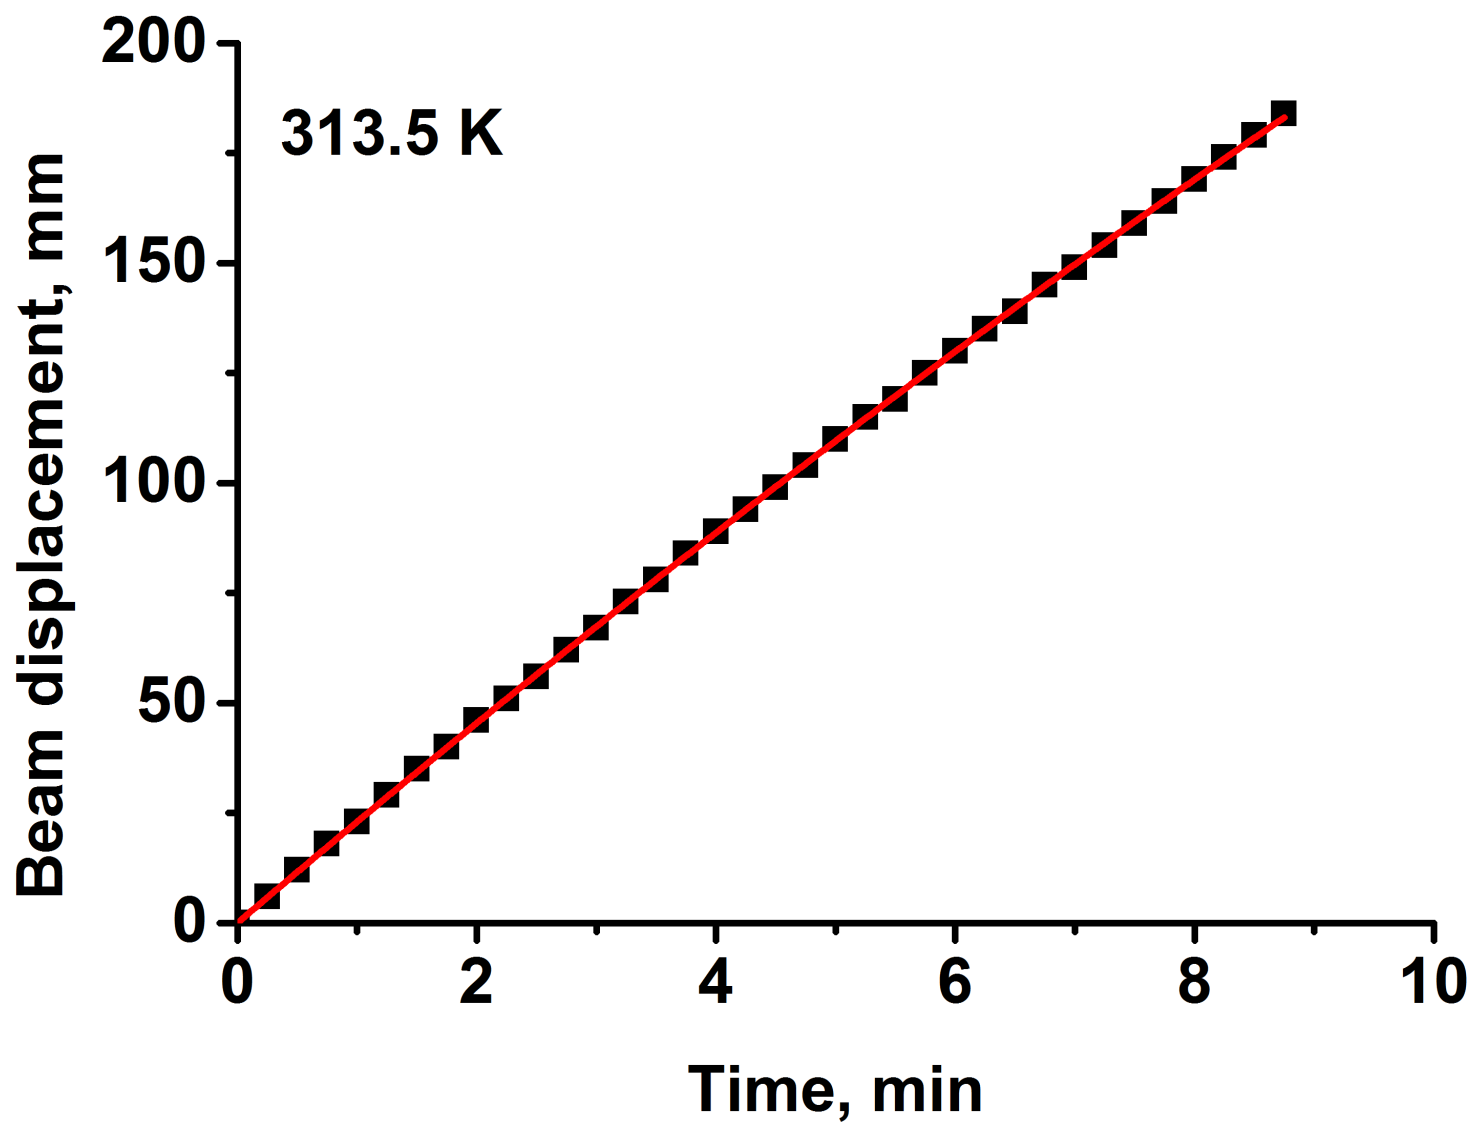

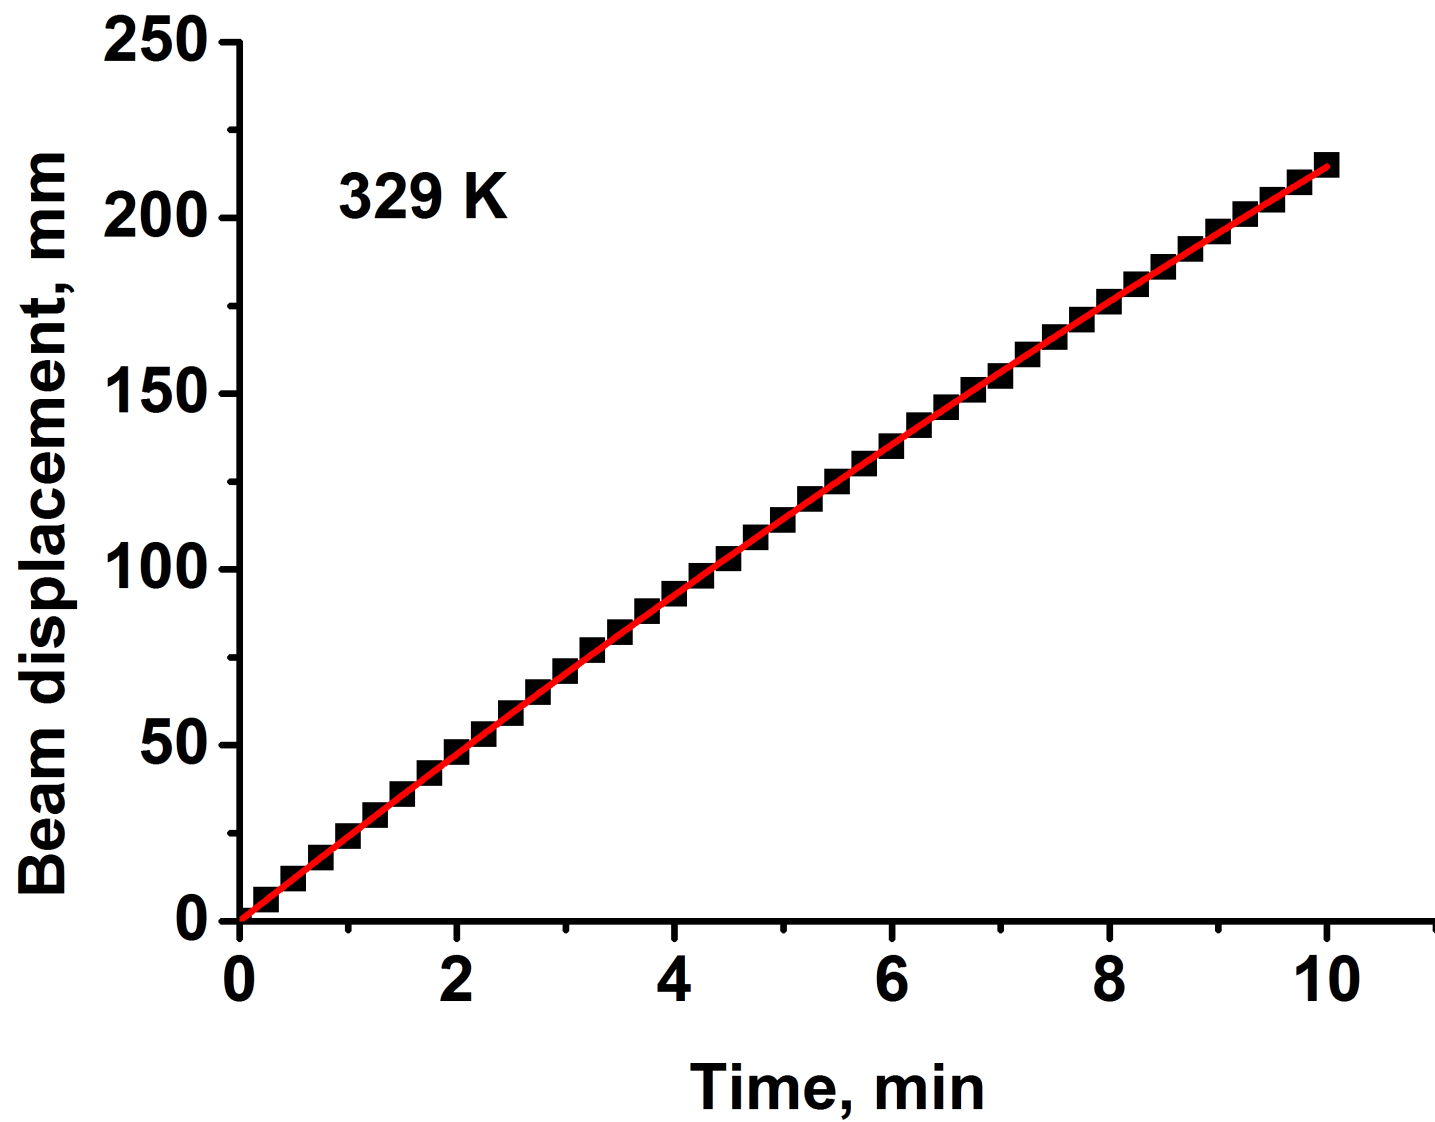

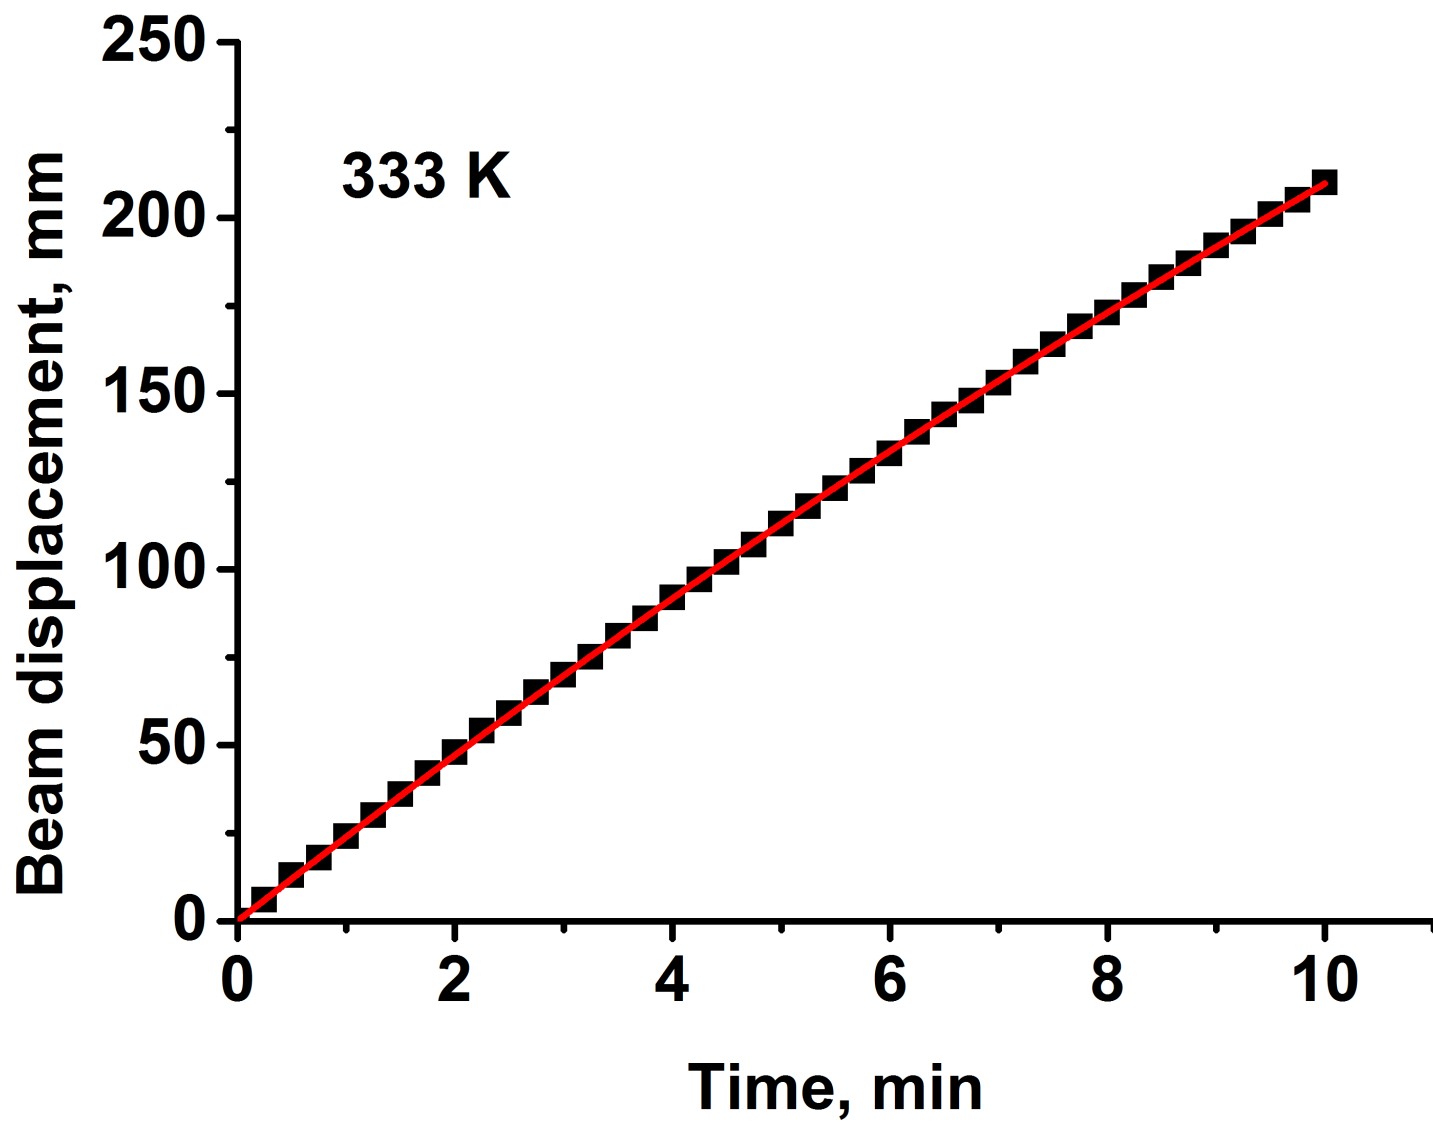

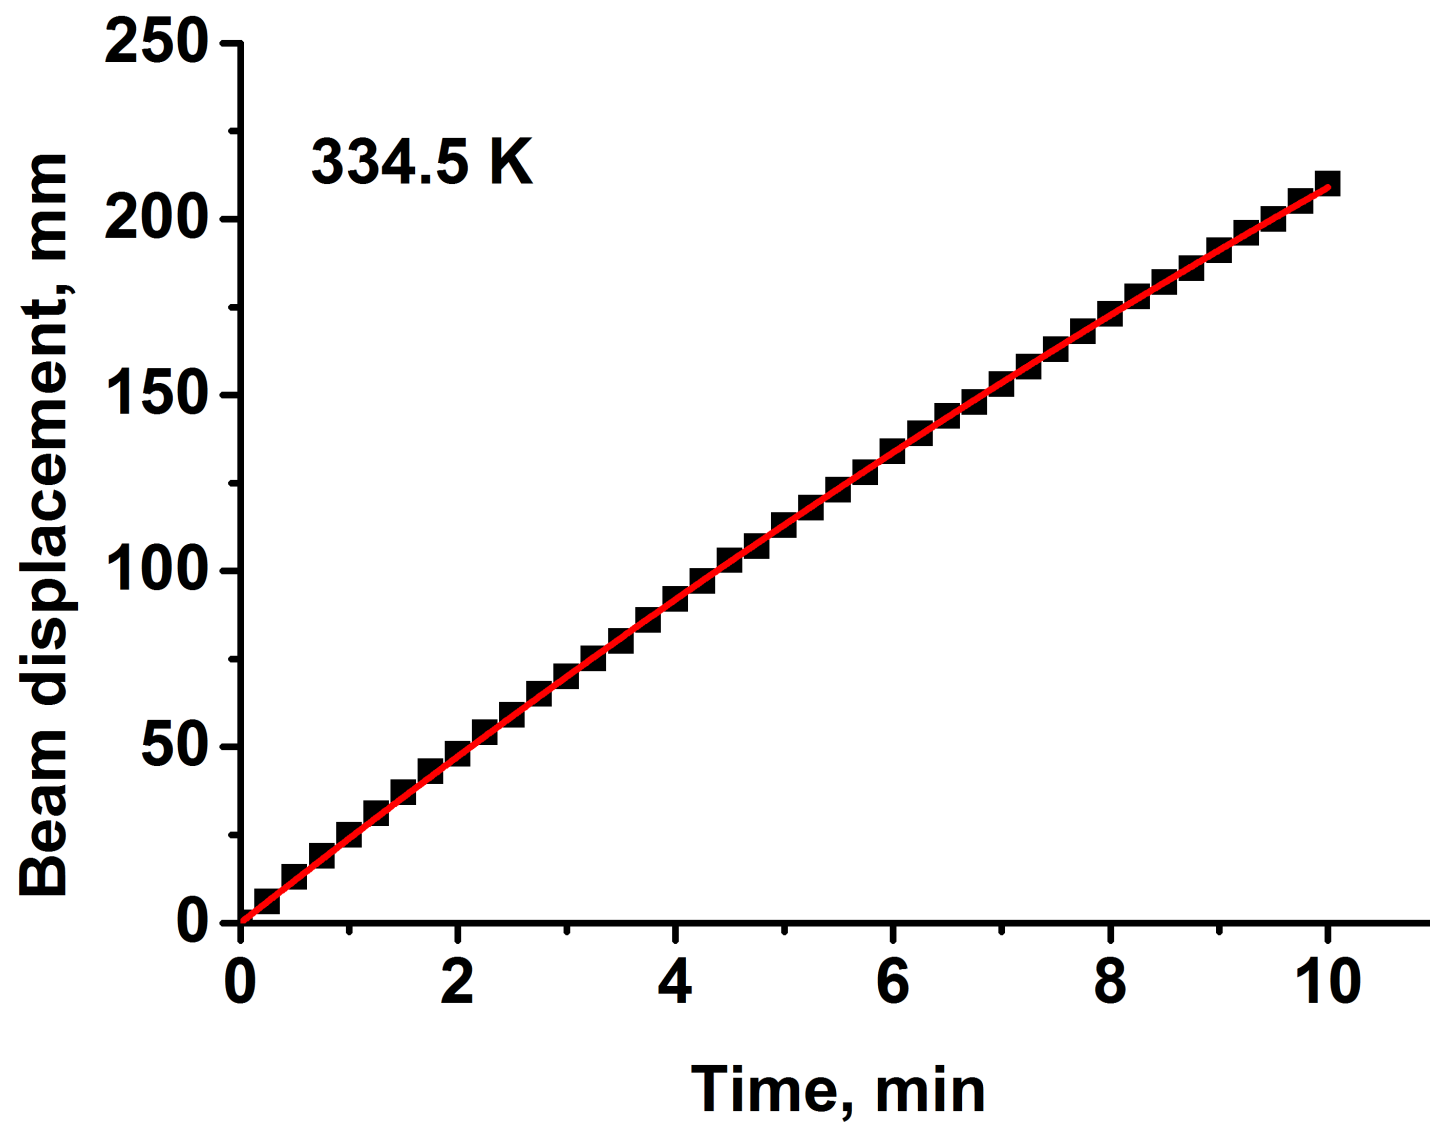

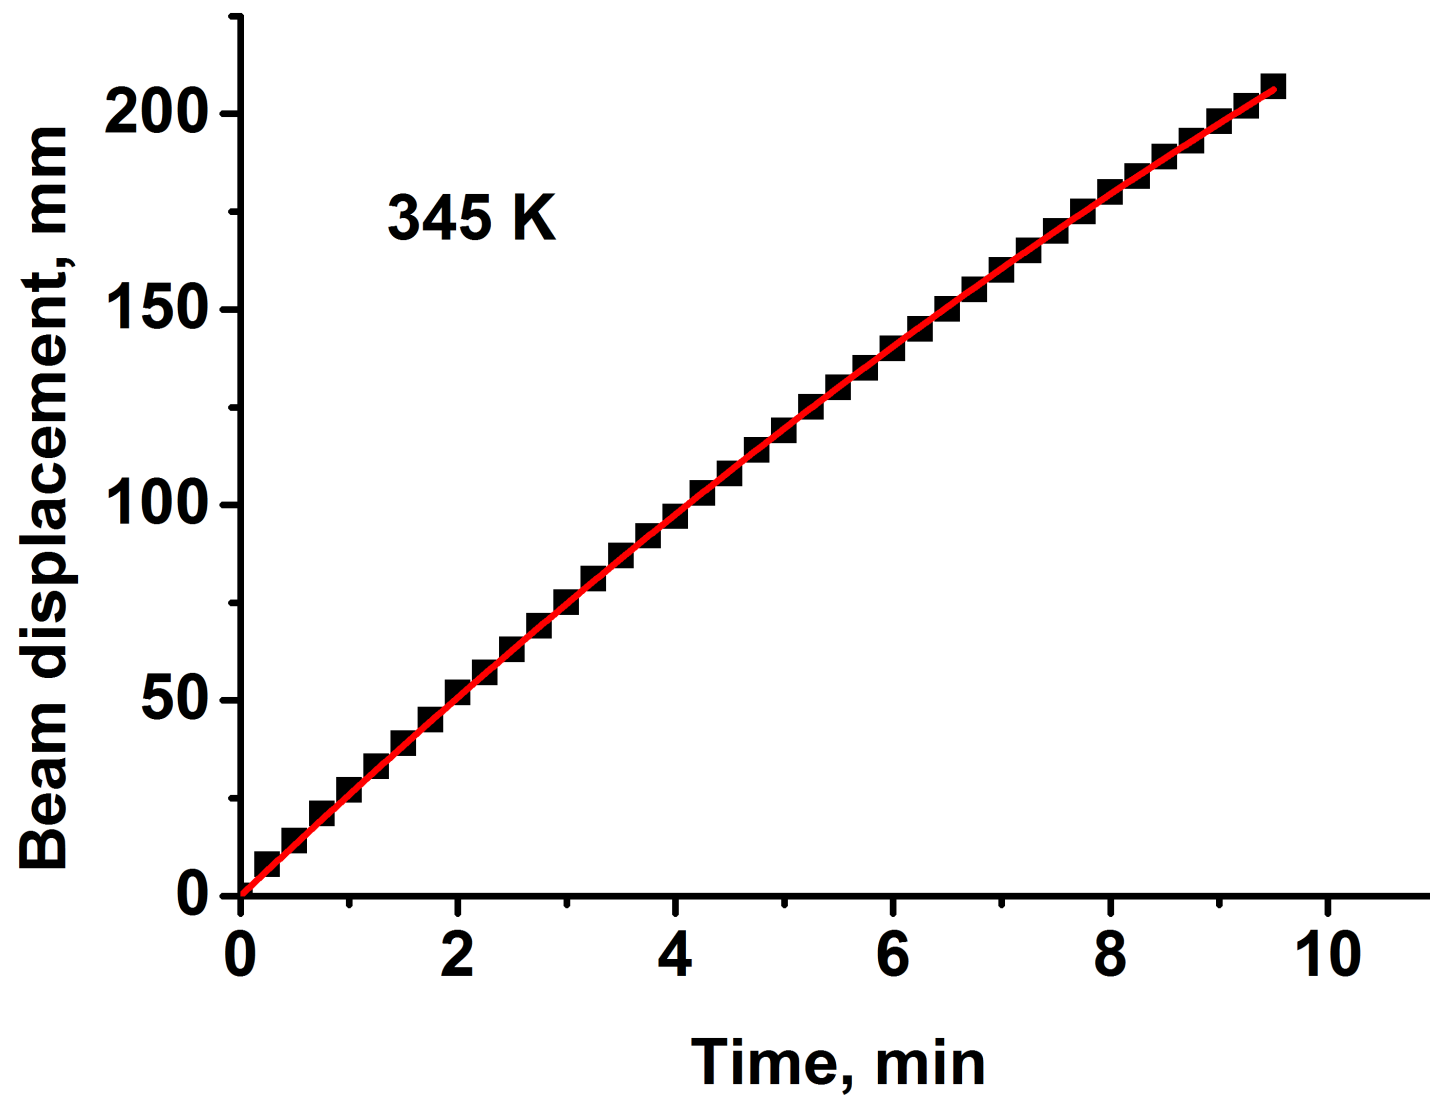



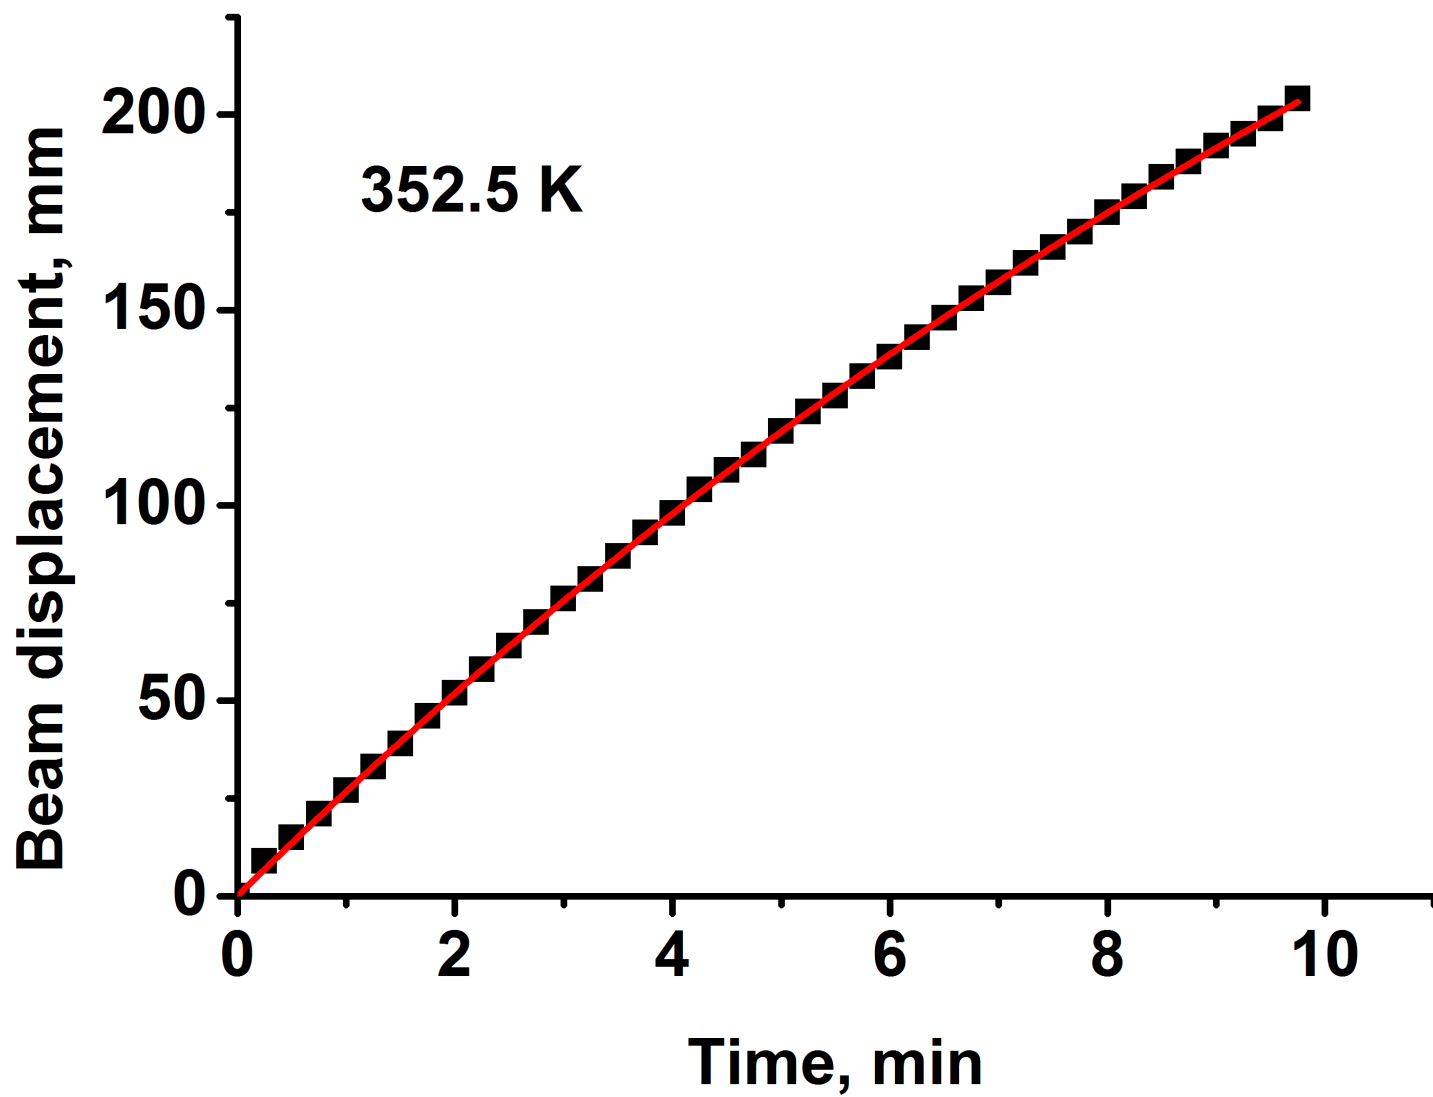

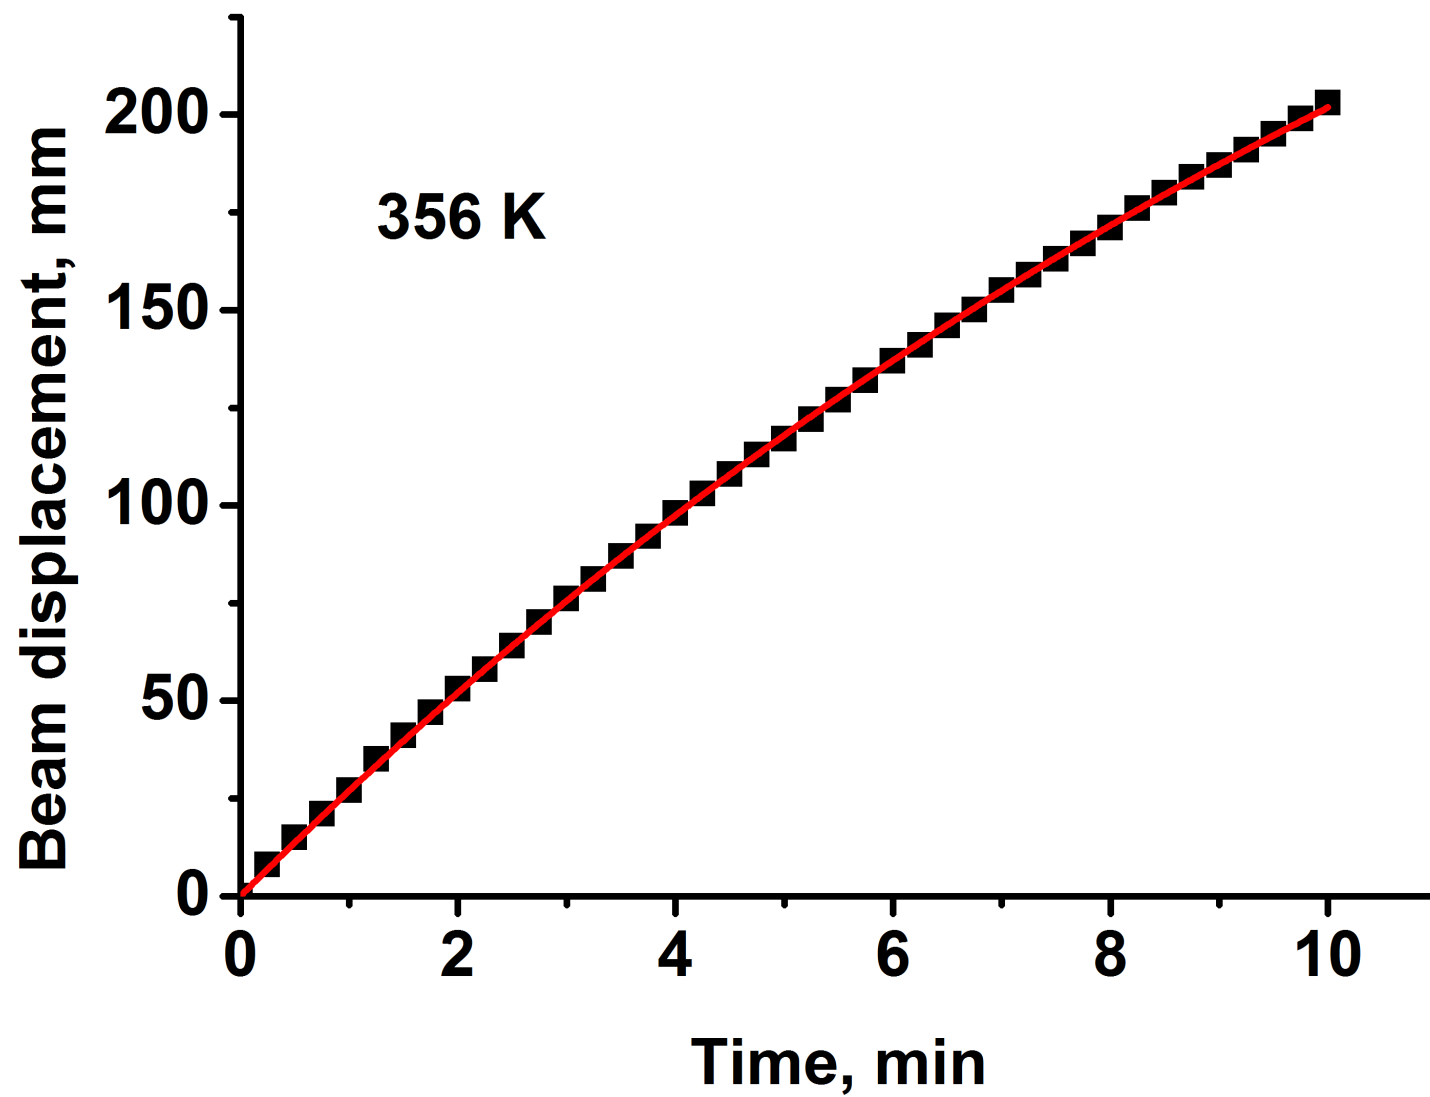

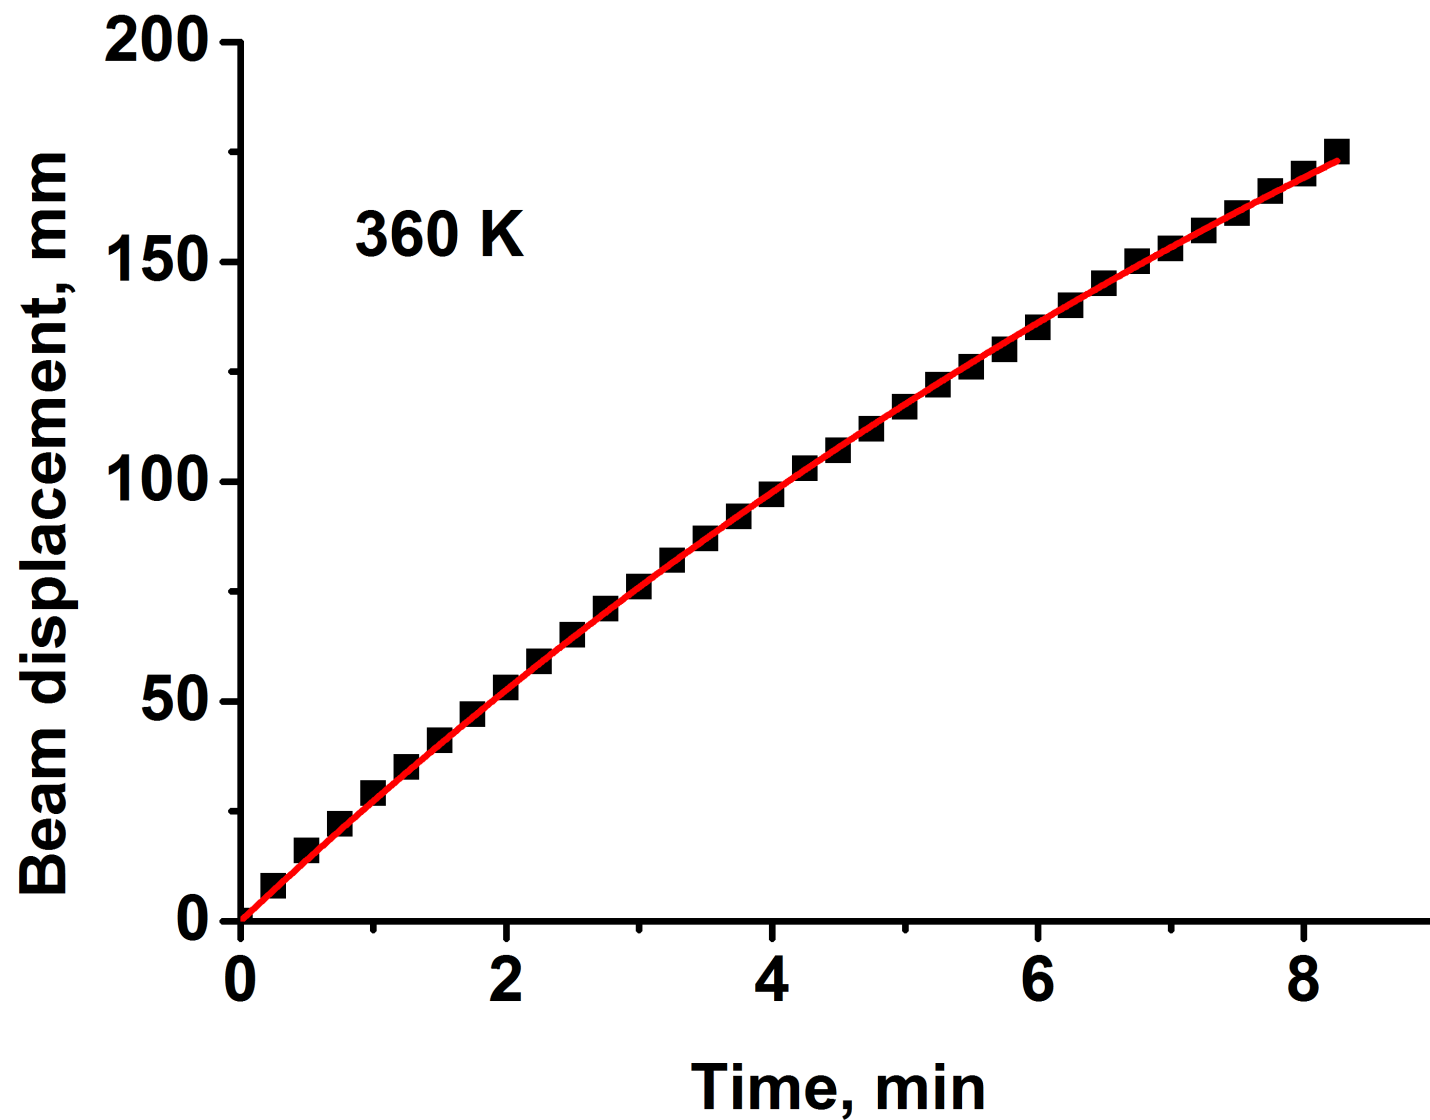

Supplement: c6ce00840b1.pdf [file c6ce00840b1.pdf]
